# Supplementary material for: Pseudomonas aeruginosa Alters Its Transcriptome Related to Carbon Metabolism and Virulence as a Possible Survival Strategy in Blood from Trauma Patients
Source: PubMed Central journal article supplement (PMC6506614; doi:10.1128/msystems.00312-18), 2019-05-07
Supplement: mSystems.00312-18-st001.pdf [file mSystems.00312-18-st001.pdf]

**Table S1**Selected genes exemplifying significant upregulation (red), downregulation (green), or no significant change.<sup>a</sup>

| Locus      | Expression |     | Fold Change   |                  | <i>p</i> Value<br>≤ 0.05 <sup>b</sup> | <i>q</i> Value<br>≤ 0.05 <sup>b</sup> | Weight<br>≥ 0.02<br>≤ -0.02 | VIP<br>≥ 1.5 | Coefficient<br>≥ 0.001<br>≤ -0.001 | Pass /<br>Fail <sup>c</sup> | Failure<br>criteria <sup>d</sup> |
|------------|------------|-----|---------------|------------------|---------------------------------------|---------------------------------------|-----------------------------|--------------|------------------------------------|-----------------------------|----------------------------------|
|            | HVs        | TPs | ≥1.50<br>(up) | ≥-1.50<br>(down) |                                       |                                       |                             |              |                                    |                             |                                  |
| PA14_01500 | 8          | 10  | 1.3           |                  | 0.03                                  | 1.00                                  | 0.01                        | 0.3          | 0.000                              | fail                        | fc <sup>e</sup>                  |
| PA14_01510 | 31         | 22  |               | -1.41            | 0.00                                  | 0.02                                  | -0.01                       | 1.2          | -0.001                             | fail                        | fc                               |
| PA14_01520 | 31         | 31  | 1.00          |                  | 0.55                                  | 1.00                                  | 0.00                        | 0.2          | 0.000                              | fail                        | fc                               |
| PA14_01540 | 112        | 85  |               | -1.32            | 0.00                                  | 0.03                                  | -0.02                       | 1.5          | -0.001                             | fail                        | fc                               |
| PA14_01550 | 66         | 63  | 0.95          |                  | 0.71                                  | 1.00                                  | 0.00                        | 0.1          | 0.000                              | fail                        | fc                               |
| PA14_01560 | 94         | 138 | 1.47          |                  | 0.00                                  | 0.00                                  | 0.02                        | 1.7          | 0.001                              | fail                        | fc                               |
| PA14_01580 | 89         | 50  |               | -1.78            | 0.00                                  | 0.00                                  | -0.03                       | 2.1          | -0.002                             | pass                        |                                  |
| PA14_01600 | 170        | 116 |               | -1.47            | 0.00                                  | 0.00                                  | -0.02                       | 1.7          | -0.001                             | fail                        | fc                               |
| PA14_01610 | 110        | 73  |               | -1.51            | 0.00                                  | 0.00                                  | -0.02                       | 1.8          | -0.002                             | pass                        |                                  |
| PA14_01620 | 159        | 137 |               | -1.16            | 0.16                                  | 0.57                                  | -0.01                       | 0.7          | -0.001                             | fail                        | fc                               |
| PA14_01640 | 12         | 11  |               | -1.09            | 0.99                                  | 1.00                                  | 0.00                        | 0.1          | 0.000                              | fail                        | fc                               |
| PA14_01660 | 15         | 20  | 1.33          |                  | 0.00                                  | 0.00                                  | 0.02                        | 1.4          | 0.001                              | fail                        | fc                               |
| PA14_01670 | 0          | 0   | 0.00          | 0.00             | 0.54                                  | 1.00                                  | 0.00                        | 0.3          | 0.000                              | fail                        | fc                               |
| PA14_01680 | 1          | 0   | 0.00          | 0.00             | 0.16                                  | 1.00                                  | -0.01                       | 0.5          | 0.000                              | fail                        | fc                               |
| PA14_01690 | 0          | 0   | 0.00          | 0.00             | 0.00                                  | 1.00                                  | -0.01                       | 0.8          | -0.001                             | fail                        | fc                               |
| PA14_02500 | 1          | 3   | 3.00          |                  | 0.00                                  | 1.00                                  | 0.01                        | 1.3          | 0.001                              | fail                        | q, w, v                          |
| PA14_02510 | 2          | 3   | 1.50          |                  | 0.07                                  | 1.00                                  | 0.00                        | 0.3          | 0.000                              | fail                        | all                              |
| PA14_02520 | 626        | 268 |               | -2.34            | 0.00                                  | 0.00                                  | -0.03                       | 2.1          | -0.002                             | pass                        |                                  |
| PA14_02530 | 116        | 174 | 1.50          |                  | 0.00                                  | 0.00                                  | 0.02                        | 1.8          | 0.002                              | pass                        |                                  |
| PA14_02550 | 44         | 258 | 5.86          |                  | 0.00                                  | 0.00                                  | 0.03                        | 2.2          | 0.002                              | pass                        |                                  |
| PA14_02560 | 5          | 21  | 4.20          |                  | 0.00                                  | 0.00                                  | 0.03                        | 2.0          | 0.002                              | pass                        |                                  |
| PA14_02570 | 4          | 24  | 6.00          |                  | 0.00                                  | 0.00                                  | 0.02                        | 1.8          | 0.002                              | pass                        |                                  |
| PA14_02580 | 12         | 36  | 3.00          |                  | 0.00                                  | 0.00                                  | 0.03                        | 1.9          | 0.002                              | pass                        |                                  |
| PA14_02590 | 6          | 24  | 4.00          |                  | 0.00                                  | 0.00                                  | 0.03                        | 2.2          | 0.002                              | pass                        |                                  |
| PA14_03100 | 2          | 5   | 2.50          |                  | 0.00                                  | 1.00                                  | 0.02                        | 1.3          | 0.001                              | fail                        | q, v                             |
| PA14_03110 | 14         | 8   |               | -1.75            | 0.00                                  | 1.00                                  | -0.01                       | 1.1          | -0.001                             | fail                        | q, w, v                          |
| PA14_03120 | 17         | 17  | 1.00          |                  | 0.38                                  | 1.00                                  | 0.00                        | 0.1          | 0.000                              | fail                        | fc                               |
| PA14_03130 | 8          | 13  | 1.63          |                  | 0.00                                  | 1.00                                  | 0.02                        | 1.5          | 0.001                              | fail                        | q                                |
| PA14_03150 | 22         | 25  | 1.14          |                  | 0.04                                  | 0.19                                  | 0.01                        | 0.3          | 0.000                              | fail                        | fc                               |

|            |     |     |      |       |      |      |       |     |        |      |         |
|------------|-----|-----|------|-------|------|------|-------|-----|--------|------|---------|
| PA14_03160 | 36  | 38  | 1.06 |       | 0.49 | 1.00 | 0.00  | 0.0 | 0.000  | fail | fc      |
| PA14_03163 | 477 | 569 | 1.19 |       | 0.00 | 0.01 | 0.02  | 1.2 | 0.001  | fail | fc      |
| PA14_03166 | 101 | 149 | 1.48 |       | 0.00 | 0.00 | 0.02  | 1.7 | 0.002  | pass |         |
| PA14_03170 | 19  | 22  | 1.16 |       | 0.01 | 0.06 | 0.01  | 0.6 | 0.001  | fail | fc      |
| PA14_03180 | 157 | 143 |      | 1.10  | 0.53 | 1.00 | -0.01 | 0.4 | 0.000  | fail | fc      |
| PA14_03190 | 93  | 60  |      | -1.55 | 0.00 | 0.00 | -0.03 | 2.3 | -0.002 | pass |         |
| PA14_03200 | 57  | 39  |      | -1.46 | 0.00 | 0.00 | -0.02 | 1.8 | -0.002 | pass |         |
| PA14_03210 | 38  | 23  |      | -1.65 | 0.00 | 0.00 | -0.02 | 1.8 | -0.002 | pass |         |
| PA14_03220 | 43  | 26  |      | -1.65 | 0.00 | 0.00 | -0.03 | 2.6 | -0.002 | pass |         |
| PA14_03240 | 202 | 189 |      | -1.07 | 0.88 | 1.00 | 0.00  | 0.4 | 0.000  | fail | fc      |
| PA14_03250 | 64  | 64  | 1.00 |       | 0.50 | 1.00 | 0.00  | 0.1 | 0.000  | fail | fc      |
| PA14_03265 | 176 | 144 |      | -1.22 | 0.01 | 0.08 | -0.01 | 1.1 | -0.001 | fail | fc      |
| PA14_03270 | 120 | 108 |      | -1.11 | 0.41 | 1.00 | -0.01 | 0.8 | -0.001 | fail | fc      |
| PA14_03285 | 50  | 54  | 1.08 |       | 0.09 | 0.37 | 0.01  | 0.4 | 0.000  | fail | fc      |
| PA14_03290 | 100 | 119 | 1.19 |       | 0.01 | 0.06 | 0.01  | 0.6 | 0.001  | fail | fc      |
| PA14_03300 | 32  | 39  | 1.22 |       | 0.01 | 0.04 | 0.01  | 0.9 | 0.001  | fail | fc      |
| PA14_32810 | 4   | 2   |      | -2.00 | 0.01 | 1.00 | -0.01 | 1.0 | -0.001 | fail | q, w, v |
| PA14_32820 | 8   | 11  | 1.38 |       | 0.00 | 1.00 | 0.01  | 0.7 | 0.001  | fail | fc      |
| PA14_32830 | 40  | 24  |      | -1.67 | 0.00 | 0.00 | -0.02 | 1.5 | -0.001 | pass |         |
| PA14_32840 | 50  | 38  |      | -1.32 | 0.00 | 0.02 | -0.01 | 0.7 | -0.001 | fail | fc      |
| PA14_32850 | 48  | 38  |      | -1.26 | 0.01 | 0.08 | -0.01 | 0.7 | -0.001 | fail | fc      |
| PA14_32860 | 20  | 18  |      | -1.11 | 0.69 | 1.00 | 0.00  | 0.3 | 0.000  | fail | fc      |
| PA14_32880 | 16  | 11  |      | -1.45 | 0.00 | 1.00 | -0.02 | 1.6 | -0.001 | fail | q       |
| PA14_32890 | 129 | 129 | 1.00 |       | 0.86 | 1.00 | 0.00  | 0.2 | 0.000  | fail | fc      |
| PA14_32905 | 137 | 59  |      | -2.32 | 0.00 | 0.00 | -0.03 | 2.2 | -0.002 | pass |         |
| PA14_32930 | 31  | 20  |      | -1.55 | 0.00 | 0.00 | -0.02 | 1.7 | -0.001 | pass |         |
| PA14_32940 | 15  | 16  | 1.07 |       | 0.39 | 1.00 | 0.00  | 0.2 | 0.000  | fail | fc      |
| PA14_32950 | 3   | 2   |      | -1.50 | 0.37 | 1.00 | -0.01 | 0.4 | 0.000  | fail | q, v    |
| PA14_32970 | 5   | 3   |      | -1.67 | 0.00 | 1.00 | -0.01 | 1.1 | -0.001 | fail | q, w, v |
| PA14_32985 | 266 | 176 |      | -1.51 | 0.00 | 0.00 | -0.02 | 1.8 | -0.002 | pass |         |
| PA14_33000 | 220 | 113 |      | -1.95 | 0.00 | 0.00 | -0.04 | 2.9 | -0.002 | pass |         |
| PA14_33010 | 109 | 63  |      | -1.73 | 0.00 | 0.00 | -0.03 | 2.3 | -0.002 | pass |         |
| PA14_33030 | 36  | 18  |      | -2.00 | 0.00 | 0.00 | -0.04 | 2.7 | -0.002 | pass |         |
| PA14_33040 | 51  | 33  |      | -1.55 | 0.00 | 0.00 | -0.02 | 1.6 | -0.001 | pass |         |
| PA14_33050 | 40  | 50  | 1.25 |       | 0.00 | 0.02 | 0.01  | 0.8 | 0.001  | fail | fc      |
| PA14_33060 | 9   | 11  | 1.22 |       | 0.01 | 1.00 | 0.01  | 0.5 | 0.000  | fail | fc      |

|            |     |     |      |       |      |      |       |     |        |      |         |
|------------|-----|-----|------|-------|------|------|-------|-----|--------|------|---------|
| PA14_33070 | 8   | 7   |      | -1.14 | 0.59 | 1.00 | 0.00  | 0.4 | 0.000  | fail | fc      |
| PA14_33080 | 11  | 13  | 1.18 |       | 0.05 | 1.00 | 0.01  | 0.3 | 0.000  | fail | fc      |
| PA14_36100 | 9   | 4   |      | -2.25 | 0.00 | 1.00 | -0.03 | 2.0 | -0.002 | fail | q       |
| PA14_36110 | 3   | 1   |      | -3.00 | 0.00 | 1.00 | -0.02 | 1.9 | -0.002 | fail | q       |
| PA14_36120 | 4   | 3   |      | -1.33 | 0.09 | 1.00 | -0.01 | 0.3 | 0.000  | fail | fc      |
| PA14_36130 | 2   | 2   | 1.00 |       | 0.70 | 1.00 | 0.00  | 0.3 | 0.000  | fail | fc      |
| PA14_36150 | 0   | 0   | 0.00 | 0.00  | 0.00 | 1.00 | -0.01 | 0.7 | -0.001 | fail | fc      |
| PA14_36170 | 0   | 0   | 0.00 | 0.00  | 0.34 | 1.00 | 0.00  | 0.2 | 0.000  | fail | fc      |
| PA14_36180 | 13  | 15  | 1.15 |       | 0.03 | 1.00 | 0.01  | 0.5 | 0.000  | fail | fc      |
| PA14_36190 | 17  | 10  |      | -1.70 | 0.00 | 1.00 | -0.02 | 1.4 | -0.001 | fail | q, v    |
| PA14_36200 | 315 | 299 |      | -1.05 | 0.74 | 1.00 | 0.00  | 0.0 | 0.000  | fail | fc      |
| PA14_36220 | 6   | 9   | 1.50 |       | 0.00 | 1.00 | 0.01  | 0.9 | 0.001  | fail | q, w, v |
| PA14_36230 | 6   | 10  | 1.67 |       | 0.00 | 1.00 | 0.01  | 0.9 | 0.001  | fail | q, w, v |
| PA14_36250 | 7   | 11  | 1.57 |       | 0.00 | 1.00 | 0.01  | 0.9 | 0.001  | fail | q, w, v |
| PA14_36260 | 2   | 2   | 1.00 |       | 0.02 | 1.00 | 0.01  | 0.4 | 0.000  | fail | fc      |
| PA14_36270 | 25  | 27  | 1.08 |       | 0.16 | 0.55 | 0.00  | 0.4 | 0.000  | fail | fc      |
| PA14_36280 | 15  | 15  | 1.00 |       | 0.43 | 1.00 | 0.00  | 0.2 | 0.000  | fail | fc      |
| PA14_36290 | 17  | 31  | 1.82 |       | 0.00 | 0.00 | 0.03  | 2.4 | 0.002  | pass |         |
| PA14_36300 | 22  | 37  | 1.68 |       | 0.00 | 0.00 | 0.03  | 2.0 | 0.002  | pass |         |

<sup>a</sup>Values were rounded to significant decimal before applying criteria.

<sup>b</sup>HVs versus TPs

<sup>c</sup>Genes were considered significantly altered in expression if all the criteria were met for q value, VIP (variable importance in projection) score, weight, and coefficient.

<sup>d</sup>fc, fold-change; q, q value; w, weight; v, VIP

<sup>e</sup>fc takes precedence; other criteria not withstanding
