# Supplementary material for: Pseudomonas aeruginosa Alters Its Transcriptome Related to Carbon Metabolism and Virulence as a Possible Survival Strategy in Blood from Trauma Patients
Source: PubMed Central journal article supplement (PMC6506614; doi:10.1128/msystems.00312-18), 2019-05-07
Supplement: mSystems.00312-18-st002.pdf [file mSystems.00312-18-st002.pdf]

**Table S2**

The expression levels of the differentially expressed genes (TPs vs. HVs) and their product description and subclassification.

| <b>Locus</b>            | <b>Gene</b>       | <b>FC<sup>a</sup></b> | <b>Product /Function<sup>b</sup> [function]<sup>c</sup></b>           | <b>Protein Class Assignment<sup>d</sup></b>                                                                           | <b>Subclass<sup>d</sup></b> |
|-------------------------|-------------------|-----------------------|-----------------------------------------------------------------------|-----------------------------------------------------------------------------------------------------------------------|-----------------------------|
| PA14_00820 <sup>e</sup> | <i>tagQ1</i>      | -1.70                 | TagQ1 / [Type VI secretion-associated lipoprotein TagQ]               | Membrane proteins; Protein secretion/ export apparatus                                                                | T6SS, HS1-T6SS              |
| PA14_00830              | <i>tagR1</i>      | -1.70                 | TagR1 / [Type VI secretion posttranslational regulatory protein TagR] | Hypothetical, unclassified, unknown                                                                                   | T6SS, HS1-T6SS              |
| PA14_00875              | <i>ppkA</i>       | -1.84                 | PpkA / Serine/threonine protein kinase                                | Adapation, protection; Protein secretion/ export apparatus; Translation, post-translational modification, degradation | T6SS, HS1-T6SS              |
| PA14_00890              | <i>pppA</i>       | -1.93                 | PppA / [serine/threonine phosphoprotein phosphatase]                  | Protein secretion/export apparatus; Putative enzymes                                                                  | T6SS, HS1-T6SS              |
| PA14_00900              | <i>tagF1</i>      | -1.74                 | TagF / [Type VI secretion-associated protein]                         | Protein secretion/export apparatus                                                                                    | T6SS, HS1-T6SS              |
| PA14_00910              | <i>icmF1</i>      | -1.71                 | IcmF1 / [IcmF domain-containing protein, type VI secretion]           | Hypothetical, unclassified, unknown                                                                                   | T6SS, HS1-T6SS              |
| PA14_00925              | <i>tssL1</i>      | -1.54                 | TssL1 / [Type IV / VI secretion system, DotU]                         | Hypothetical, unclassified, unknown                                                                                   | T6SS, HS1-T6SS              |
| PA14_00940              | <i>tssK1</i>      | -1.70                 | TssK1 / [Type VI secretion protein]                                   | Hypothetical, unclassified, unknown                                                                                   | T6SS, HS1-T6SS              |
| PA14_00960              | <i>tssJ1</i>      | -1.82                 | TssJ1 / [Type VI secretion lipoprotein]                               | Fatty acid and phospholipid metabolism                                                                                | T6SS, HS1-T6SS              |
| PA14_00970              | <i>PA14_00970</i> | -1.67                 | / [Type VI secretion system, FHA domain-containing protein]           | Hypothetical, unclassified, unknown                                                                                   | T6SS, HS1-T6SS              |
| PA14_00990              | <i>tssA1</i>      | -1.85                 | TssA1 / [Type VI secretion-associated protein, ImpA family]           | Hypothetical, unclassified, unknown                                                                                   | T6SS, HS1-T6SS              |
| PA14_01010              | <i>hsiB1</i>      | -1.79                 | HsiB1 / [Type VI secretion protein TssB1 or ImpB]                     | Protein secretion/export apparatus                                                                                    | T6SS, HS1-T6SS              |
| PA14_01020              | <i>hsiC1</i>      | -1.75                 | HsiC1 / [Type VI secretion protein TssB1, EvpB or ImpC]               | Protein secretion/export apparatus                                                                                    | T6SS, HS1-T6SS              |
| PA14_01030              | <i>hcp1</i>       | -1.57                 | Hcp1 / [Hcp1 family type VI secretion system effector]                | Hypothetical, unclassified, unknown                                                                                   | T6SS, HS1-T6SS              |
| PA14_01040              | <i>tagJ1</i>      | -1.52                 | TagJ1 / [Type VI secretion virulence protein, SciE type]              | Protein secretion/export apparatus                                                                                    | T6SS, HS1-T6SS              |
| PA14_01060              | <i>tssE1</i>      | -1.64                 | TssE1 / [Type VI secretion system lysozyme-like protein TssE]         | Protein secretion/export apparatus                                                                                    | T6SS, HS1-T6SS              |
| PA14_01070              | <i>tssF1</i>      | -1.56                 | TssF1 / [Type VI secretion protine TssF or ImpG]                      | Protein secretion/export apparatus                                                                                    | T6SS, HS1-T6SS              |

| Locus      | Gene              | FC <sup>a</sup> | Product /Function <sup>b</sup> [function] <sup>c</sup>                        | Protein Class Assignment <sup>d</sup>                     | Subclass <sup>d</sup> |
|------------|-------------------|-----------------|-------------------------------------------------------------------------------|-----------------------------------------------------------|-----------------------|
| PA14_01080 | <i>tssG1</i>      | -1.82           | TssG1 / [Type VI secretion protein TssG]                                      | Hypothetical, unclassified, unknown                       | T6SS, HS1-T6SS        |
| PA14_01100 | <i>clpV1</i>      | -1.77           | ClpV1 / [Type VI secretion ATPase ClpV1]                                      | Translation, post-translational modification, degradation | T6SS, HS1-T6SS        |
| PA14_01110 | <i>vgrG1</i>      | -1.77           | VgrG1 / [Type VI secretion system, Vgr family or ImpA family]                 | Hypothetical, unclassified, unknown                       | T6SS, HS1-T6SS        |
| PA14_01150 | <i>eagT6</i>      | -2.00           | EagT6 / Hypothetical protein                                                  | Hypothetical, unclassified, unknown                       | T6SS, HS1-T6SS        |
| PA14_01160 | <i>PA14_01160</i> | -1.77           | / [ImpA family type VI secretion-associated protein; Rhs element Vgr protein] | Hypothetical, unclassified, unknown                       | T6SS                  |
| PA14_01180 | <i>PA14_01180</i> | -1.63           | / Hypothetical protein                                                        | Hypothetical, unclassified, unknown                       |                       |
| PA14_01200 | <i>PA14_01200</i> | -1.64           | / Hypothetical protein                                                        | Hypothetical, unclassified, unknown                       |                       |
| PA14_01460 | <i>dctA</i>       | -1.54           | DctA / C4-dicarboxylate transport protein                                     | Transport of small molecules                              |                       |
| PA14_01580 | <i>gabP</i>       | -1.78           | GabP / Gamma-aminobutyrate (GABA) permease                                    | Transport of small molecules                              |                       |
| PA14_01610 | <i>PA14_01610</i> | -1.51           | / Hypothetical protein [cupin 2 protein]                                      | Carbon compound catabolism                                |                       |
| PA14_02230 | <i>cheW</i>       | -1.83           | CheW / Purine-binding chemotaxis protein                                      | Chemotaxis                                                |                       |
| PA14_02260 | <i>PA14_02260</i> | -1.73           | / Two-component response regulator [CheY]                                     | Two-component regulatory systems                          |                       |
| PA14_02520 | <i>PA14_02520</i> | -2.34           | / Hypothetical protein                                                        | Hypothetical, unclassified, unknown                       |                       |
| PA14_02530 | <i>PA14_02530</i> | 1.50            | / Hypothetical protein [esterase or alpha/beta hydrolase fold protein]        | Hypothetical, unclassified, unknown                       |                       |
| PA14_02550 | <i>mdcA</i>       | 5.86            | MdcA / Malonate decarboxylase subunit alpha                                   | Carbon compound catabolism                                | Malonate              |
| PA14_02560 | <i>PA14_02560</i> | 4.20            | / Triphosphoribosyl-dephospho-CoA synthase                                    | Biosynthesis of cofactors, prosthetic groups and carriers | Malonate              |
| PA14_02570 | <i>mdcC</i>       | 6.00            | MdcC / Malonate decarboxylase subunit delta                                   | Carbon compound catabolism                                | Malonate              |
| PA14_02580 | <i>mdcD</i>       | 3.00            | MdcD / Malonate decarboxylase subunit beta                                    | Carbon compound catabolism                                | Malonate              |
| PA14_02590 | <i>mdcE</i>       | 4.00            | MdcE / Malonate decarboxylase subunit gamma                                   | Carbon compound catabolism                                | Malonate              |
| PA14_03190 | <i>tli3</i>       | -1.55           | Tli3 / Hypothetical protein; probably T6SS related                            | Hypothetical, unclassified, unknown                       | T6SS                  |
| PA14_03210 | <i>PA14_03210</i> | -1.65           | / Hypothetical protein; probably T6SS related                                 | Hypothetical, unclassified, unknown                       | T6SS                  |

| <b>Locus</b> | <b>Gene</b>       | <b>FC<sup>a</sup></b> | <b>Product /Function<sup>b</sup> [function]<sup>c</sup></b>                          | <b>Protein Class Assignment<sup>d</sup></b>                                                                             | <b>Subclass<sup>d</sup></b> |
|--------------|-------------------|-----------------------|--------------------------------------------------------------------------------------|-------------------------------------------------------------------------------------------------------------------------|-----------------------------|
| PA14_03220   | <i>vgrG2b</i>     | -1.65                 | VgrG2b / [ImpA family type VI secretion-associated protein; Rhs element Vgr protein] | Hypothetical, unclassified, unknown                                                                                     | T6SS                        |
| PA14_03610   | <i>PA14_03610</i> | -1.71                 | / Zn-dependent protease with chaperone function                                      | Chaperones and heat shock proteins                                                                                      |                             |
| PA14_03700   | <i>sbp</i>        | 2.02                  | Sbp / Sulfate-binding protein                                                        | Transport of small molecules                                                                                            |                             |
| PA14_03710   | <i>PA14_03710</i> | 2.04                  | / Hypothetical protein                                                               | Hypothetical, unclassified, unknown                                                                                     |                             |
| PA14_03790   | <i>PA14_03790</i> | -1.54                 | / Sensory box GGDEF domain-containing protein                                        | Two-component regulatory system                                                                                         |                             |
| PA14_04180   | <i>PA14_04180</i> | 3.04                  | / Hypothetical protein [stress-induced protein YgiW]                                 | Hypothetical, unclassified, unknown                                                                                     | Heavy metals                |
| PA14_04290   | <i>PA14_04290</i> | -1.87                 | / [Arginine-specific autotransporter of <i>Pseudomonas aeruginosa</i> , AaaA]        | Amino acid biosynthesis and metabolism;<br>Membrane proteins                                                            | Amino acids                 |
| PA14_05110   | <i>PA14_05110</i> | -1.54                 | / Hypothetical protein [GTPase (dynamin-...)]                                        | Hypothetical, unclassified, unknown                                                                                     |                             |
| PA14_05600   | <i>PA14_05600</i> | -1.67                 | / Hypothetical protein                                                               | Hypothetical, unclassified, unknown                                                                                     |                             |
| PA14_05620   | <i>sahH</i>       | -1.73                 | SahH / S-adenosyl-L-homocysteine hydrolase                                           | Amino acid biosynthesis and metabolism;<br>Central intermediary metabolism                                              | Amino acids                 |
| PA14_06420   | <i>PA14_06420</i> | -3.09                 | / [LamB/YcsF family protein]                                                         | Antibiotic resistance and susceptibility                                                                                |                             |
| PA14_06430   | <i>PA14_06430</i> | -3.15                 | / [acetyl-CoA carboxylase, bitoin carboxyl carrier protein AccB]                     | Putative enzymes                                                                                                        |                             |
| PA14_06920   | <i>PA14_06920</i> | -1.64                 | / Class III pyridoxal phosphate-dependent aminotransferase                           | Putative enzymes; Transport of small molecules                                                                          |                             |
| PA14_07090   | <i>metK</i>       | -1.80                 | MetK / S-adenosylmethionine synthetase                                               | Amino acid biosynthesis and metabolism;<br>Antibiotic resistance and susceptibility;<br>Central intermediary metabolism | Amino acids                 |
| PA14_07330   | <i>PA14_07330</i> | -1.55                 | / Hypothetical protein                                                               | Hypothetical, unclassified, unknown                                                                                     |                             |
| PA14_07355   | <i>PA14_07355</i> | 1.93                  | / [Alkylhydroperoxidase or carboxymuconolactone decarboxylase family protein]        | Hypothetical, unclassified, unknown                                                                                     |                             |
| PA14_07400   | <i>PA14_07400</i> | -1.56                 | / Hypothetical protein                                                               | Hypothetical, unclassified, unknown                                                                                     |                             |
| PA14_08450   | <i>PA14_08450</i> | -1.53                 | / Hypothetical protein                                                               | Membrane proteins                                                                                                       |                             |
| PA14_09280   | <i>pchF</i>       | -1.56                 | PchF / Pyochelin synthetase                                                          | Transport of small molecules                                                                                            | Pyochelin                   |

| <b>Locus</b> | <b>Gene</b>       | <b>FC<sup>a</sup></b> | <b>Product /Function<sup>b</sup> [function]<sup>c</sup></b>                                     | <b>Protein Class Assignment<sup>d</sup></b>               | <b>Subclass<sup>d</sup></b> |
|--------------|-------------------|-----------------------|-------------------------------------------------------------------------------------------------|-----------------------------------------------------------|-----------------------------|
| PA14_09300   | <i>PA14_09300</i> | -1.80                 | / ABC transporter ATP-binding protein                                                           | Transport of small molecules                              | Pyochelin                   |
| PA14_09320   | <i>PA14_09320</i> | -1.81                 | / ABC transporter ATP-binding protein                                                           | Transport of small molecules                              | Pyochelin                   |
| PA14_11370   | <i>PA14_11370</i> | -1.82                 | / Lipoprotein                                                                                   | Fatty acid and phospholipid metabolism                    |                             |
| PA14_11410   | <i>ribC</i>       | -1.75                 | RibC / Riboflavin synthase subunit alpha                                                        | Biosynthesis of cofactors, prosthetic groups and carriers |                             |
| PA14_11470   | <i>pgpA</i>       | 1.62                  | PgpA / Phosphatidylglycerophosphatase A                                                         | Fatty acid and phospholipid metabolism                    |                             |
| PA14_12570   | <i>PA14_12570</i> | -1.69                 | / Transcriptional regulator, AsnC family                                                        | Transcriptional regulators                                |                             |
| PA14_13010   | <i>PA14_13010</i> | 3.08                  | / [NLPA lipoprotein or methionine ABC transporter substrate-binding protein]                    | Hypothetical, unclassified, unknown                       |                             |
| PA14_13130   | <i>PA14_13130</i> | -1.59                 | / Hypothetical protein [type V secretory pathway, adhesin AidA]                                 | Hypothetical, unclassified, unknown                       |                             |
| PA14_13140   | <i>PA14_13140</i> | -1.93                 | / Hypothetical protein                                                                          | Hypothetical, unclassified, unknown                       |                             |
| PA14_13230   | <i>moaC</i>       | -1.52                 | MoaC / Molybdenum cofactor biosynthesis protein                                                 | Biosynthesis of cofactors, prosthetic groups and carriers |                             |
| PA14_13300   | <i>PA14_13300</i> | 1.74                  | / Collagenase-like protease                                                                     | Translation, post-translational modification, degradation |                             |
| PA14_13580   | <i>PA14_13580</i> | 1.90                  | / ABC transporter ATP-binding protein [Glycine betaine/L-proline transport ATP-binding protein] | Transport of small molecules                              |                             |
| PA14_14210   | <i>PA14_14210</i> | -1.73                 | / Hypothetical protein                                                                          | Hypothetical, unclassified, unknown                       |                             |
| PA14_14290   | <i>PA14_14290</i> | -2.19                 | / [Glutathione S-transferase family protein]                                                    | Hypothetical, unclassified, unknown                       |                             |
| PA14_14390   | <i>PA14_14390</i> | -1.50                 | / ABC-type transport protein, periplasmic                                                       | Transport of small molecules                              |                             |
| PA14_15030   | <i>leuA</i>       | -2.12                 | LeuA / 2-isopropylmalate synthase                                                               | Amino acid biosynthesis and metabolism                    | Amino acids                 |
| PA14_15350   | <i>PA14_15350</i> | 1.88                  | / Integrase                                                                                     | Related to phage, transposon, or plasmid                  |                             |
| PA14_16010   | <i>PA14_16010</i> | 2.29                  | / [Long-chain acyl-CoA thioester hydrolase]                                                     | Fatty acid and phospholipid metabolism                    |                             |
| PA14_16180   | <i>PA14_16180</i> | -1.68                 | / Hypothetical protein                                                                          | Hypothetical, unclassified, unknown                       |                             |

| <b>Locus</b> | <b>Gene</b>       | <b>FC<sup>a</sup></b> | <b>Product /Function<sup>b</sup> [function]<sup>c</sup></b>                               | <b>Protein Class Assignment<sup>d</sup></b>               | <b>Subclass<sup>d</sup></b> |
|--------------|-------------------|-----------------------|-------------------------------------------------------------------------------------------|-----------------------------------------------------------|-----------------------------|
| PA14_16190   | <i>PA14_16190</i> | -1.57                 | / Hypothetical protein                                                                    | Hypothetical, unclassified, unknown                       |                             |
| PA14_16200   | <i>PA14_16200</i> | -1.66                 | / [Phosphatidylserine/phosphatidylglycerophosphate/cardiolipin synthases,related enzymes] | Hypothetical, unclassified, unknown                       |                             |
| PA14_16660   | <i>PA14_16660</i> | 2.88                  | / Metal-transporting P-type ATPase                                                        | Transport of small molecules                              | Heavy metals                |
| PA14_16840   | <i>PA14_16840</i> | -1.74                 | / Lipoprotein                                                                             | Fatty acid and phospholipid metabolism                    |                             |
| PA14_17000   | <i>PA14_17000</i> | -3.18                 | / Hypothetical protein                                                                    | Hypothetical, unclassified, unknown                       |                             |
| PA14_17120   | <i>cdsA</i>       | 2.13                  | CdsA / Phosphatidate cytidyltransferase                                                   | Fatty acid and phospholipid metabolism                    |                             |
| PA14_17220   | <i>lpxB</i>       | 1.55                  | LpxB / Lipid-A-disaccharide synthase                                                      | Cell wall / LPS / capsule                                 |                             |
| PA14_17340   | <i>ispD</i>       | 1.52                  | IspD / 2-C-methyl-D-erythritol 4-phosphate cytidyltransferase                             | Biosynthesis of cofactors, prosthetic groups and carriers |                             |
| PA14_17510   | <i>PA14_17510</i> | -1.95                 | / [putative TolB-like translocation protein]                                              | Protein secretion/export apparatus                        |                             |
| PA14_17600   | <i>PA14_17600</i> | -1.54                 | / Hypothetical protein                                                                    | Protein secretion/export apparatus                        |                             |
| PA14_17720   | <i>PA14_17720</i> | -1.67                 | / LuxR family transcriptional regulator                                                   | Transcriptional regulators                                |                             |
| PA14_17930   | <i>glpD</i>       | -1.60                 | GlpD / Glycerol-3-phosphate dehydrogenase                                                 | Central intermediary metabolism; Energy metabolism        |                             |
| PA14_17980   | <i>glpF</i>       | -1.71                 | GlpF / Glycerol uptake facilitator protein                                                | Transport of small molecules                              |                             |
| PA14_19020   | <i>tse3</i>       | -1.52                 | Tse3 / Hypothetical protein T6SS secreted effector protein                                | Secreted factors (toxins, enzymes, alginate)              | T6SS                        |
| PA14_19100   | <i>rhIA</i>       | 2.31                  | RhIA / Rhamnosyltransferase chain A                                                       | Secreted factors (toxins, enzymes, alginate)              |                             |
| PA14_19190   | <i>PA14_19190</i> | -1.59                 | / Malate dehydrogenase                                                                    | Central intermediary metabolism                           |                             |
| PA14_19320   | <i>PA14_19320</i> | -2.17                 | / Hypothetical protein                                                                    | Hypothetical, unclassified, unknown                       |                             |
| PA14_19490   | <i>lsfA</i>       | 2.37                  | LsfA / 1-Cys peroxiredoxin LsfA                                                           | Adaptation, protection                                    |                             |
| PA14_19530   | <i>PA14_19530</i> | 3.11                  | / NAD(P)H-dependent FMN reductase                                                         | Central intermediary metabolism                           |                             |

| <b>Locus</b> | <b>Gene</b>       | <b>FC<sup>a</sup></b> | <b>Product /Function<sup>b</sup> [function]<sup>c</sup></b>   | <b>Protein Class Assignment<sup>d</sup></b>            | <b>Subclass<sup>d</sup></b> |
|--------------|-------------------|-----------------------|---------------------------------------------------------------|--------------------------------------------------------|-----------------------------|
| PA14_19680   | <i>PA14_19680</i> | 2.67                  | / [Murein hydrolase transporter LgrA]                         | Membrane proteins; Protein secretion/ export apparatus |                             |
| PA14_20010   | <i>hasR</i>       | -2.27                 | HasR / Heme uptake outer membrane receptor                    | Transport of small molecules                           | Heme                        |
| PA14_20390   | <i>phnJ</i>       | 4.75                  | PhnJ / [Carbon-phosphorus lyase complex subunit]              | Transport of small molecules                           |                             |
| PA14_20550   | <i>PA14_20550</i> | -1.71                 | / Hypothetical protein                                        | Hypothetical, unclassified, unknown                    |                             |
| PA14_21570   | <i>PA14_21570</i> | 2.99                  | / Hypothetical protein                                        | Hypothetical, unclassified, unknown                    |                             |
| PA14_21580   | <i>PA14_21580</i> | 2.78                  | / Hypothetical protein                                        | Hypothetical, unclassified, unknown                    |                             |
| PA14_21590   | <i>PA14_21590</i> | 3.00                  | / Hypothetical protein                                        | Hypothetical, unclassified, unknown                    |                             |
| PA14_21600   | <i>PA14_21600</i> | 4.18                  | / [DoxX family protein]                                       | Membrane proteins                                      |                             |
| PA14_21610   | <i>oprO</i>       | 4.92                  | OprO / Pyrophosphate-specific outer membrane porin            | Transport of small molecules                           |                             |
| PA14_22280   | <i>PA14_22280</i> | 1.72                  | / Pirin-related protein                                       | Transcriptional regulators                             |                             |
| PA14_24050   | <i>xcpV</i>       | -1.68                 | XcpV / General secretion pathway protein I for T2SS           | Protein secretion/export apparatus                     | T2SS                        |
| PA14_24300   | <i>PA14_24300</i> | -1.56                 | / Hypothetical protein                                        | Hypothetical, unclassified, unknown                    |                             |
| PA14_24330   | <i>PA14_24330</i> | -1.52                 | / [RND efflux transporter]                                    | Motility and attachment                                |                             |
| PA14_24850   | <i>PA14_24850</i> | 1.70                  | / [Glutaredoxin or thiol-disulfide isomerase and thioredoxin] | Hypothetical, unclassified, unknown                    |                             |
| PA14_24950   | <i>PA14_24950</i> | -1.73                 | / FAD-dependent glycerol-3-phosphate                          | Carbon compound catabolism; Energy                     |                             |
| PA14_24960   | <i>PA14_24960</i> | -1.71                 | / Carbohydrate kinase                                         | Carbon compound catabolism                             |                             |
| PA14_25030   | <i>PA14_25030</i> | 1.65                  | / Hypothetical protein                                        | Hypothetical, unclassified, unknown                    |                             |
| PA14_25410   | <i>PA14_25410</i> | -1.55                 | / Hypothetical protein                                        | Hypothetical, unclassified, unknown                    |                             |
| PA14_25540   | <i>ptpA</i>       | 1.54                  | PtpA / Phosphotyrosine protein phosphatase                    | Amino acid biosynthesis and metabolism                 | Amino acids                 |
| PA14_25620   | <i>PA14_25620</i> | 1.72                  | / Hypothetical protein                                        | Hypothetical, unclassified, unknown                    |                             |
| PA14_25640   | <i>plsX</i>       | 1.53                  | PlsX / Glycerol-3-phosphate acyltransferase                   | Fatty acid and phospholipid metabolism                 |                             |

| <b>Locus</b> | <b>Gene</b>       | <b>FC<sup>a</sup></b> | <b>Product /Function<sup>b</sup> [function]<sup>c</sup></b>             | <b>Protein Class Assignment<sup>d</sup></b>              | <b>Subclass<sup>d</sup></b> |
|--------------|-------------------|-----------------------|-------------------------------------------------------------------------|----------------------------------------------------------|-----------------------------|
| PA14_25650   | <i>fabD</i>       | -1.52                 | FabD / Malonyl CoA-acyl carrier protein transacylase                    | Fatty acid and phospholipid metabolism                   |                             |
| PA14_25980   | <i>aroF</i>       | -2.90                 | AroF / Phospho-2-dehydro-3-deoxyheptonate aldolase                      | Amino acid biosynthesis and metabolism                   | Amino acids                 |
| PA14_26020   | <i>PA14_26020</i> | -1.63                 | / Aminopeptidase                                                        | Secreted factors (toxins, enzymes, alginate)             |                             |
| PA14_27100   | <i>lipA</i>       | -1.78                 | LipA / Lactonizing lipase precursor                                     | Secreted factors (toxins, enzymes, alginate)             |                             |
| PA14_27520   | <i>PA14_27520</i> | -1.56                 | / Glutathione peroxidase                                                | Adaptation, protection                                   |                             |
| PA14_27830   | <i>PA14_27830</i> | 5.81                  | / [Two-component response repressor, PtrA]                              | Adaptation, protection; Transcriptional regulators       |                             |
| PA14_28010   | <i>PA14_28010</i> | -1.68                 | / Hypothetical protein                                                  | Hypothetical, unclassified, unknown                      |                             |
| PA14_28390   | <i>PA14_28390</i> | -2.00                 | / Hypothetical protein                                                  | Hypothetical, unclassified, unknown                      |                             |
| PA14_29190   | <i>PA14_29190</i> | -1.70                 | / Tsi2-like immunity protein                                            | Adaptation, protection                                   | T6SS                        |
| PA14_29200   | <i>PA14_29200</i> | -1.79                 | / Tse2-like effector protein                                            | Secreted factors (toxins, enzymes, alginate)             | T6SS                        |
| PA14_29330   | <i>PA14_29330</i> | -1.91                 | / Hypothetical protein                                                  | Hypothetical, unclassified, unknown                      |                             |
| PA14_29400   | <i>PA14_29400</i> | -1.86                 | / Hypothetical protein                                                  | Cell wall / LPS / capsule                                |                             |
| PA14_29830   | <i>PA14_29830</i> | -1.80                 | / Methyltransferase                                                     | Antibiotic resistance and susceptibility                 |                             |
| PA14_30700   | <i>PA14_30700</i> | 1.53                  | / Sensor/response regulator hybrid [Hpt sensor hybrid histidine kinase] | Two-component regulatory systems                         |                             |
| PA14_30730   | <i>PA14_30730</i> | -1.52                 | / Hypothetical protein                                                  | Hypothetical, unclassified, unknown                      |                             |
| PA14_30800   | <i>PA14_30800</i> | 1.60                  | / Hypothetical protein                                                  | Energy metabolism                                        |                             |
| PA14_31040   | <i>PA14_31040</i> | 1.50                  | / Cation efflux system protein                                          | Protein secretion/export apparatus                       |                             |
| PA14_31050   | <i>PA14_31050</i> | 1.68                  | / Hypothetical protein [Heat shock protein HtpX]                        | Hypothetical, unclassified, unknown                      |                             |
| PA14_31580   | <i>PA14_31580</i> | 1.83                  | / Acyl-CoA dehydrogenase                                                | Fatty acid and phospholipid metabolism; Putative enzymes |                             |

| <b>Locus</b> | <b>Gene</b>   | <b>FC<sup>a</sup></b> | <b>Product /Function<sup>b</sup> [function]<sup>c</sup></b> | <b>Protein Class Assignment<sup>d</sup></b>                                                         | <b>Subclass<sup>d</sup></b> |
|--------------|---------------|-----------------------|-------------------------------------------------------------|-----------------------------------------------------------------------------------------------------|-----------------------------|
| PA14_31700   | <i>PA14_3</i> | -1.71                 | / CDP-alcohol phosphatidyltransferase                       | Fatty acid and phospholipid metabolism;                                                             |                             |
| PA14_31720   | <i>PA14_3</i> | -2.38                 | / [Lysophospholipase]                                       | Fatty acid and phospholipid metabolism                                                              |                             |
| PA14_31750   | <i>PA14_3</i> | -1.78                 | / Acyltransferase                                           | Fatty acid and phospholipid metabolism                                                              |                             |
|              | 1750          |                       |                                                             |                                                                                                     |                             |
| PA14_31760   | <i>PA14_3</i> | -1.74                 | / Phosphatidate cytidyltransferase                          | Fatty acid and phospholipid metabolism                                                              |                             |
|              | 1760          |                       |                                                             |                                                                                                     |                             |
| PA14_31770   | <i>PA14_3</i> | -1.82                 | / Oxidoreductase                                            | Energy metabolism                                                                                   |                             |
|              | 1770          |                       |                                                             |                                                                                                     |                             |
| PA14_31820   | <i>PA14_3</i> | -2.30                 | / Aminotransferase                                          | Amino acid biosynthesis and metabolism                                                              | Amino acids                 |
|              | 1820          |                       |                                                             |                                                                                                     |                             |
| PA14_31960   | <i>PA14_3</i> | 6.80                  | / Two-component response regulator [CzrR/CzcR]              | Two-component regulatory systems                                                                    | Heavy metals                |
|              | 1960          |                       |                                                             |                                                                                                     |                             |
| PA14_31990   | <i>czcB</i>   | 4.50                  | CzcB / Cobalt/zinc/cadmium efflux RND                       | Transport of small molecules                                                                        | Heavy metals                |
| PA14_32250   | <i>PA14_3</i> | 5.17                  | / Hypothetical protein                                      | Hypothetical, unclassified, unknown                                                                 |                             |
| PA14_32270   | <i>PA14_3</i> | 2.96                  | / Porin [outer membrane porin, OprD family]                 | Transport of small molecules                                                                        |                             |
| PA14_32905   | <i>PA14_3</i> | -2.32                 | / Hypothetical protein [enterochelin esterase-]             | Hypothetical, unclassified, unknown                                                                 |                             |
| PA14_32930   | <i>PA14_3</i> | -1.55                 | / Hypothetical protein                                      | Hypothetical, unclassified, unknown                                                                 |                             |
| PA14_32985   | <i>gcvH2</i>  | -1.51                 | GcvH2 / Glycine cleavage system H protein                   | Amino acid biosynthesis and metabolism                                                              | Amino acids                 |
| PA14_33000   | <i>gcvP2</i>  | -1.95                 | GcvP2 / Glycine dehydrogenase                               | Amino acid biosynthesis and metabolism                                                              | Amino acids                 |
| PA14_33010   | <i>glyA2</i>  | -1.73                 | GlyA2 / Serine hydroxymethyltransferase                     | Amino acid biosynthesis and metabolism                                                              | Amino acids                 |
| PA14_33030   | <i>sdaA</i>   | -2.00                 | SdaA / L-serine dehydratase                                 | Amino acid biosynthesis and metabolism                                                              | Amino acids                 |
| PA14_33040   | <i>gcvT2</i>  | -1.55                 | GcvT2 / Glycine cleavage system protein T2                  | Amino acid biosynthesis and metabolism;                                                             | Amino acids                 |
|              |               |                       |                                                             | Central intermediary metabolism                                                                     |                             |
| PA14_33500   | <i>pvdH</i>   | -2.35                 | PvdH / Diaminobutyrate-2-oxoglutarate aminotransferase      | Adaptation, protection; Transport of small molecules                                                | Pyoverdine                  |
| PA14_33520   | <i>PA14_3</i> | -1.55                 | / Thioesterase                                              | Adaptation, protection; Biosynthesis of cofactors, prosthetic groups and carriers; Putative enzymes |                             |
|              | 3520          |                       |                                                             |                                                                                                     |                             |
| PA14_33550   | <i>PA14_3</i> | -1.83                 | / ABC transporter ATP-binding protein                       | Transport of small molecules                                                                        |                             |
|              | 3550          |                       |                                                             |                                                                                                     |                             |
| PA14_33680   | <i>fpvA</i>   | -1.56                 | FpvA / Ferripyoverdine receptor                             | Transport of small molecules                                                                        | Pyoverdine                  |
| PA14_33690   | <i>pvdE</i>   | -2.11                 | PvdE / Pyoverdine biosynthesis protein                      | Adaptation, protection; Membrane proteins; Transport of small molecules                             | Pyoverdine                  |
| PA14_33700   | <i>pvdF</i>   | -1.89                 | PvdF / Pyoverdine synthetase                                | Adaptation, protection; Secreted factors (toxins, enzymes, alginate)                                | Pyoverdine                  |
| PA14_33710   | <i>pvdO</i>   | -1.83                 | PvdO / [Chromophore maturation protein]                     | Adaptation, protection                                                                              | Pyoverdine                  |



| <b>Locus</b> | <b>Gene</b>                  | <b>FC<sup>a</sup></b> | <b>Product /Function<sup>b</sup> [function]<sup>c</sup></b>      | <b>Protein Class Assignment<sup>d</sup></b>                      | <b>Subclass<sup>d</sup></b> |
|--------------|------------------------------|-----------------------|------------------------------------------------------------------|------------------------------------------------------------------|-----------------------------|
| PA14_33720   | <i>pvdN</i>                  | -1.72                 | PvdN / [Chromophore maturation protein; class V aminotransferase | Adapatation, protection; Transport of small molecules            | Pyoverdine                  |
| PA14_33750   | <i>PA14_3</i>                | -1.59                 | / Outer membrane protein [pyoverdine efflux]                     | Transport of small molecules                                     | Pyoverdine                  |
| PA14_33810   | <i>pvdA</i>                  | -2.27                 | PvdA / L-ornithine 5-monooxygenase                               | Biosynthesis of cofactors, prosthetic groups and carriers        | Pyoverdine                  |
| PA14_33820   | <i>pvdQ</i>                  | -1.72                 | PvdQ / Penicillin acylase-related protein                        | Adaptation, protection; Antibiotic resistance and susceptibility | Pyoverdine                  |
| PA14_33860   | <i>lldA</i>                  | 1.85                  | LldA / L-lactate dehydrogenase                                   | Energy metabolism                                                |                             |
| PA14_33870   | <i>PA14_3</i><br><i>3870</i> | 1.80                  | / Hypothetical protein                                           | Hypothetical, unclassified, unknown                              |                             |
| PA14_34030   | <i>hcp3</i>                  | -2.67                 | Hcp3 / [Hemolysin co-regulated T6SS effector]                    | Hypothetical, unclassified, unknown                              | T6SS, H3-T6SS               |
| PA14_34050   | <i>hsiC3</i>                 | -2.00                 | HsiC3 / [EvpB family T6SS protein]                               | Hypothetical, unclassified, unknown                              | T6SS, H3-T6SS               |
| PA14_34370   | <i>PA14_3</i><br><i>4370</i> | 9.60                  | / ABC maltose/mannitol transporter ATP-binding protein           | Transport of small molecules                                     | Mannitol                    |
| PA14_34390   | <i>PA14_3</i><br><i>4390</i> | 34.00                 | / Binding-protein-dependent maltose/mannitol transport protein   | Transport of small molecules                                     | Mannitol                    |
| PA14_34600   | <i>PA14_3</i><br><i>4600</i> | 1.52                  | / Glyceraldehyde-3-phosphate dehydrogenase                       | Carbon compound catabolism                                       |                             |
| PA14_35780   | <i>PA14_3</i><br><i>5780</i> | -1.59                 | / Hypothetical protein                                           | Hypothetical, unclassified, unknown                              |                             |
| PA14_35790   | <i>PA14_3</i><br><i>5790</i> | -1.53                 | / Homospermidine synthase                                        | Putative enzymes; Secreted factors (toxins, enzymes, alginate)   |                             |
| PA14_36290   | <i>PA14_3</i><br><i>6290</i> | 1.82                  | / [Oxidoreductase]                                               | Energy metabolism; Putative enzymes                              |                             |
| PA14_36300   | <i>PA14_3</i><br><i>6300</i> | 1.68                  | / TetR family transcriptional regulator                          | Transcriptional regulators                                       |                             |
| PA14_36330   | <i>hcnA</i>                  | 2.94                  | HcnA / Hydrogen cyanide synthase                                 | Central intermediary metabolism                                  |                             |
| PA14_37080   | <i>PA14_3</i><br><i>7080</i> | -1.52                 | / [Transcriptional regulator; cupA gene regulator C, CgrC]       | Transcriptional regulators                                       |                             |
| PA14_37250   | <i>PA14_3</i><br><i>7250</i> | -1.86                 | / Major facilitator transporter                                  | Transport of small molecules                                     |                             |
| PA14_37590   | <i>kynB</i>                  | -1.69                 | KynB / Kynurenine formamidase                                    | Amino acid biosynthesis and metabolism; Putative enzymes         | Amino acids                 |
| PA14_38500   | <i>PA14_3</i><br><i>8500</i> | 1.65                  | / lclR family transcriptional regulator                          | Transcriptional regulators                                       |                             |

| <b>Locus</b> | <b>Gene</b>       | <b>FC<sup>a</sup></b> | <b>Product /Function<sup>b</sup> [function]<sup>c</sup></b>                   | <b>Protein Class Assignment<sup>d</sup></b>             | <b>Subclass<sup>d</sup></b> |
|--------------|-------------------|-----------------------|-------------------------------------------------------------------------------|---------------------------------------------------------|-----------------------------|
| PA14_39350   | <i>rbsB</i>       | 1.76                  | / Ribose ABC transporter substrate-binding protein                            | Transport of small molecules                            |                             |
| PA14_39460   | <i>PA14_39460</i> | -1.64                 | / [Catalase]                                                                  | Hypothetical, unclassified, unknown                     |                             |
| PA14_39590   | <i>metE</i>       | -1.98                 | MetE / 5-methyltetrahydropteroyltriglutamate/homocysteine S-methyltransferase | Amino acid biosynthesis and metabolism                  | Amino acids                 |
| PA14_40650   | <i>PA14_40650</i> | -1.83                 | / Hypothetical protein [Tsi1-like T6SS immunity protein]                      | Hypothetical, unclassified, unknown                     | T6SS-related                |
| PA14_40660   | <i>PA14_40660</i> | -2.12                 | / Hypothetical protein [Tse1-like T6SS effector protein]                      | Hypothetical, unclassified, unknown                     | T6SS-related                |
| PA14_41420   | <i>PA14_41420</i> | -1.57                 | / Hypothetical protein                                                        | Hypothetical, unclassified, unknown                     |                             |
| PA14_41760   | <i>PA14_41760</i> | -1.92                 | / Hypothetical protein                                                        | Hypothetical, unclassified, unknown                     |                             |
| PA14_41790   | <i>PA14_41790</i> | -1.63                 | / Hypothetical protein                                                        | Hypothetical, unclassified, unknown                     |                             |
| PA14_42630   | <i>PA14_42630</i> | 1.66                  | / Translocation protein in T3SS                                               | Protein secretion/export apparatus                      | T3SS                        |
| PA14_42660   | <i>pscU</i>       | 2.91                  | PscU / Translocation protein in T3SS                                          | Protein secretion/export apparatus                      | T3SS                        |
| PA14_42700   | <i>alkA</i>       | -1.67                 | AlkA / DNA-3-methyladenine glycosylase II                                     | DNA replication, recombination, modification and repair |                             |
| PA14_43610   | <i>PA14_43610</i> | -1.78                 | / AMP-binding protein                                                         | Fatty acid and phospholipid metabolism                  |                             |
| PA14_43780   | <i>PA14_43780</i> | -1.60                 | / Oxoreductase                                                                | Energy metabolism                                       |                             |
| PA14_43790   | <i>PA14_43790</i> | -1.63                 | / Aldehyde dehydrogenase                                                      | Putative enzymes                                        |                             |
| PA14_44710   | <i>xdhA</i>       | -1.56                 | XdhA / Xanthine dehydrogenase                                                 | Nucleotide biosynthesis and metabolism                  |                             |
| PA14_44800   | <i>PA14_44800</i> | -1.75                 | / Transporter [Xanthine/uracil/vitamin C permease]                            | Membrane proteins; Transport of small molecules         |                             |
| PA14_44830   | <i>PA14_44830</i> | -1.69                 | / [Chitin or polysaccharide deacetylase family protein]                       | Carbon compound catabolism                              |                             |
| PA14_44840   | <i>PA14_44840</i> | -1.73                 | / [possible OHCU decarboxylase]                                               | Hypothetical, unclassified, unknown                     |                             |
| PA14_44850   | <i>alc</i>        | -1.72                 | Alc / Allantoicase                                                            | Carbon compound catabolism                              |                             |
| PA14_44860   | <i>PA14_44860</i> | -1.69                 | / Ureidoglycolate hydrolase                                                   | Central intermediary metabolism                         |                             |

| <b>Locus</b> | <b>Gene</b>       | <b>FC<sup>a</sup></b> | <b>Product /Function<sup>b</sup> [function]<sup>c</sup></b>                  | <b>Protein Class Assignment<sup>d</sup></b>                     | <b>Subclass<sup>d</sup></b> |
|--------------|-------------------|-----------------------|------------------------------------------------------------------------------|-----------------------------------------------------------------|-----------------------------|
| PA14_44880   | <i>PA14_44880</i> | -2.43                 | / Hypothetical protein                                                       | Membrane proteins                                               |                             |
| PA14_45350   | <i>ccmC</i>       | 1.77                  | CcmC / Heme exporter protein                                                 | Transport of small molecules                                    | Heme                        |
| PA14_46370   | <i>PA14_46370</i> | -1.78                 | / Two-component sensor [Sensor histidine kinase/response regulator]          | Two-component regulatory systems                                |                             |
| PA14_46640   | <i>PA14_46640</i> | -2.86                 | / Siderophore receptor                                                       | Transport of small molecules                                    | Iron utilization            |
| PA14_46910   | <i>PA14_46910</i> | -1.97                 | / ABC transporter substrate-binding protein                                  | Transport of small molecules                                    | Amino acids                 |
| PA14_46920   | <i>PA14_46920</i> | -1.54                 | / ABC transporter permease [Glutamate/aspartate transporter GltJ]            | Membrane proteins; Transport of small molecules                 | Amino acids                 |
| PA14_46930   | <i>PA14_46930</i> | -1.52                 | / ABC transporter permease [Glutamate/aspartate transporter GltK]            | Transport of small molecules                                    | Amino acids                 |
| PA14_46950   | <i>PA14_46950</i> | -1.63                 | / ABC transporter ATP-binding protein [Glutamate/aspartate transporter GltL] | Transport of small molecules                                    | Amino acids                 |
| PA14_46960   | <i>ggt</i>        | -1.94                 | Ggt / Gamma-glutamyltranspeptidase                                           | Central intermediary metabolism                                 |                             |
| PA14_46970   | <i>ansB</i>       | -2.29                 | AnsB / Glutaminase-asparaginase                                              | Amino acid biosynthesis and metabolism                          | Amino acids                 |
| PA14_48060   | <i>aprA</i>       | 1.67                  | AprA / Alkaline metalloproteinase                                            | Secreted factors (toxins, enzymes, alginate)                    |                             |
| PA14_48140   | <i>aprX</i>       | 1.86                  | / Hypothetical protein [AprX in <i>P. aeruginosa</i> PAO1]                   | Membrane proteins; Secreted factors (toxins, enzymes, alginate) |                             |
| PA14_49320   | <i>PA14_49320</i> | -1.71                 | / [Alginate lyase 2]                                                         | Hypothetical, unclassified, unknown                             |                             |
| PA14_49560   | <i>toxA</i>       | -1.89                 | ToxA / Exotoxin A                                                            | Secreted factors (toxins, enzymes, alginate)                    |                             |
| PA14_49650   | <i>PA14_49650</i> | -2.15                 | / Hypothetical protein                                                       | Hypothetical, unclassified, unknown                             |                             |
| PA14_49850   | <i>PA14_49850</i> | 1.53                  | / Hypothetical protein                                                       | Hypothetical, unclassified, unknown                             |                             |
| PA14_50610   | <i>PA14_50610</i> | -1.78                 | / Short-chain dehydrogenase                                                  | Putative enzymes                                                |                             |
| PA14_50620   | <i>PA14_50620</i> | -1.63                 | / Hypothetical protein [possible bacteriophage protein]                      | Hypothetical, unclassified, unknown                             |                             |
| PA14_50770   | <i>PA14_50770</i> | 1.63                  | / Transporter [putative gluconate transporter]                               | Transport of small molecules                                    |                             |
| PA14_51680   | <i>PA14_51680</i> | 2.36                  | / Radical activating enzyme [SAM domain]                                     | Putative enzymes                                                |                             |

| <b>Locus</b> | <b>Gene</b>       | <b>FC<sup>a</sup></b> | <b>Product /Function<sup>b</sup> [function]<sup>c</sup></b> | <b>Protein Class Assignment<sup>d</sup></b> | <b>Subclass<sup>d</sup></b> |
|--------------|-------------------|-----------------------|-------------------------------------------------------------|---------------------------------------------|-----------------------------|
| PA14_52080   | <i>PA14_52080</i> | 1.71                  | / Hypothetical protein                                      | Hypothetical, unclassified, unknown         |                             |
| PA14_52090   | <i>PA14_52090</i> | 1.84                  | / Hypothetical protein                                      | Hypothetical, unclassified, unknown         |                             |
| PA14_52120   | <i>PA14_52120</i> | 3.20                  | / Hypothetical protein                                      | Hypothetical, unclassified, unknown         |                             |
| PA14_53210   | <i>PA14_53210</i> | -1.55                 | / Hypothetical protein                                      | Hypothetical, unclassified, unknown         |                             |
| PA14_53260   | <i>PA14_53260</i> | -1.67                 | / Hypothetical protein [threonine dehydratase]              | Hypothetical, unclassified, unknown         |                             |
| PA14_53400   | <i>PA14_53400</i> | 1.72                  | / Oxidoreductase                                            | Putative enzymes                            |                             |
| PA14_53410   | <i>PA14_53410</i> | 1.83                  | / Transcriptional regulator [TetR family]                   | Transcriptional regulators                  |                             |
| PA14_53820   | <i>PA14_53820</i> | 1.79                  | / [N-acetylmuramoyl-L-alanine amidase]                      | Antibiotic resistance and susceptibility    |                             |
| PA14_54130   | <i>PA14_54130</i> | -1.54                 | / Transcriptional regulator [LysR family]                   | Transcriptional regulators                  |                             |
| PA14_54540   | <i>PA14_54540</i> | 2.92                  | / [Tricarboxylate transport protein TctC]                   | Hypothetical, unclassified, unknown         |                             |
| PA14_54630   | <i>PA14_54630</i> | -1.93                 | / Acyl-CoA dehydrogenase                                    | Putative enzymes                            |                             |
| PA14_54640   | <i>PA14_54640</i> | -1.68                 | / Enoyl-CoA hydratase                                       | Putative enzymes                            |                             |
| PA14_54750   | <i>PA14_54750</i> | 2.11                  | / Hypothetical protein                                      | Hypothetical, unclassified, unknown         |                             |
| PA14_54850   | <i>PA14_54850</i> | 2.50                  | / [Bacteriophage-related integrase]                         | Hypothetical, unclassified, unknown         |                             |
| PA14_54870   | <i>PA14_54870</i> | 1.79                  | / [Transcriptional regulator, AraC family]                  | Hypothetical, unclassified, unknown         |                             |
| PA14_55810   | <i>PA14_55810</i> | -1.59                 | / Two-component response regulator LuxR family (PAO1 PrpB)  | Two-component regulatory systems            |                             |
| PA14_56100   | <i>PA14_56100</i> | -1.52                 | / Hypothetical protein [RDD domain-containing protein]      | Membrane proteins                           |                             |
| PA14_56200   | <i>PA14_56200</i> | -1.60                 | / Hypothetical protein [possible lipoprotein]               | Fatty acid and phospholipid metabolism      |                             |

| <b>Locus</b> | <b>Gene</b>       | <b>FC<sup>a</sup></b> | <b>Product /Function<sup>b</sup> [function]<sup>c</sup></b>         | <b>Protein Class Assignment<sup>d</sup></b>                                                       | <b>Subclass<sup>d</sup></b> |
|--------------|-------------------|-----------------------|---------------------------------------------------------------------|---------------------------------------------------------------------------------------------------|-----------------------------|
| PA14_56360   | <i>PA14_56360</i> | 1.65                  | / Hypothetical protein [possible arylsulfate sulfotransferase]      | Hypothetical, unclassified, unknown                                                               |                             |
| PA14_58130   | <i>mreC</i>       | 1.78                  | MreC / Rod shape-determining protein                                | Cell wall / LPS / capsule                                                                         |                             |
| PA14_58240   | <i>PA14_58240</i> | -1.75                 | / Hypothetical protein                                              | Hypothetical, unclassified, unknown                                                               |                             |
| PA14_58350   | <i>dppA1</i>      | -1.81                 | DppA1 / Dipeptide-binding ABC transporter substrate-binding protein | Transport of small molecules                                                                      |                             |
| PA14_59390   | <i>PA14_59390</i> | 1.92                  | / Hypothetical protein                                              | Hypothetical, unclassified, unknown                                                               |                             |
| PA14_59780   | <i>rcsC</i>       | 1.60                  | RcsC / Kinase sensor protein                                        | Two-component regulatory systems                                                                  |                             |
| PA14_59970   | <i>PA14_59970</i> | 1.61                  | / Hypothetical protein                                              | Hypothetical, unclassified, unknown                                                               |                             |
| PA14_60030   | <i>PA14_60030</i> | 1.54                  | / Hypothetical protein                                              | Hypothetical, unclassified, unknown                                                               |                             |
| PA14_60490   | <i>PA14_60490</i> | -1.63                 | / Cytochrome c family protein                                       | Energy metabolism                                                                                 |                             |
| PA14_60530   | <i>PA14_60530</i> | 1.95                  | / Hypothetical protein                                              | Hypothetical, unclassified, unknown                                                               |                             |
| PA14_60730   | <i>PA14_60730</i> | -1.67                 | / Outer membrane protein                                            | Membrane proteins; Transport of small molecules                                                   |                             |
| PA14_60750   | <i>pra</i>        | -1.81                 | Pra / protein activator                                             | Carbon compound catabolism                                                                        |                             |
| PA14_61270   | <i>PA14_61270</i> | -1.97                 | / Hypothetical protein                                              | Hypothetical, unclassified, unknown                                                               |                             |
| PA14_61920   | <i>PA14_61920</i> | -3.00                 | / Hypothetical protein                                              | Hypothetical, unclassified, unknown                                                               |                             |
| PA14_61940   | <i>PA14_61940</i> | -1.89                 | / Hypothetical protein                                              | Hypothetical, unclassified, unknown                                                               |                             |
| PA14_62100   | <i>PA14_62100</i> | 2.92                  | / Sulfite oxidase subunit YedZ                                      | Membrane proteins                                                                                 |                             |
| PA14_62110   | <i>PA14_62110</i> | 2.77                  | / Sulfite oxidase subunit YedY                                      | Putative enzymes                                                                                  |                             |
| PA14_62130   | <i>ilvC</i>       | -1.54                 | IlvC / Ketol-acid reductoisomerase                                  | Amino acid biosynthesis and metabolism; Biosynthesis of cofactors, prosthetic groups and carriers | Amino acids                 |

| <b>Locus</b> | <b>Gene</b>       | <b>FC<sup>a</sup></b> | <b>Product /Function<sup>b</sup> [function]<sup>c</sup></b>                        | <b>Protein Class Assignment<sup>d</sup></b>                                                             | <b>Subclass<sup>d</sup></b> |
|--------------|-------------------|-----------------------|------------------------------------------------------------------------------------|---------------------------------------------------------------------------------------------------------|-----------------------------|
| PA14_62150   | <i>ilvH</i>       | -1.70                 | IlvH / Acetolactate synthase 3 regulatory subunit                                  | Amino acid biosynthesis and metabolism;<br>Biosynthesis of cofactors, prosthetic groups<br>and carriers | Amino acids                 |
| PA14_62160   | <i>ilvI</i>       | -1.57                 | IlvI / Acetolactate synthase 3 catalytic subunit                                   | Amino acid biosynthesis and metabolism;<br>Biosynthesis of cofactors, prosthetic groups<br>and carriers | Amino acids                 |
| PA14_64350   | <i>ureA</i>       | -1.86                 | UreA / Urease subunit gamma                                                        | Central intermediary metabolism                                                                         |                             |
| PA14_64550   | <i>PA14_64550</i> | 2.25                  | / [Thiosulfate reductase cytochrome B subunit]                                     | Energy metabolism                                                                                       |                             |
| PA14_64840   | <i>PA14_64840</i> | -1.70                 | / Short-chain dehydrogenase                                                        | Putative enzymes                                                                                        |                             |
| PA14_64870   | <i>PA14_64870</i> | -2.33                 | / ABC transporter ATP-binding protein [for<br>Branched-chain amino acid transport] | Transport of small molecules                                                                            | Amino acids                 |
| PA14_64950   | <i>pncA</i>       | -2.69                 | PncA / [Nicotinamidase]                                                            | Central intermediary metabolism                                                                         |                             |
| PA14_64960   | <i>pncB1</i>      | -2.09                 | PncB1 / Nicotinate phosphoribosyl-transferase                                      | Biosynthesis of cofactors, prosthetic groups<br>and carriers                                            |                             |
| PA14_64980   | <i>nadE</i>       | -2.25                 | NadE / NAD synthetase                                                              | Amino acid biosynthesis and metabolism;                                                                 | Amino acids                 |
| PA14_65030   | <i>PA14_65030</i> | 1.60                  | / [Putative metalloendopeptidase-related<br>membrane protein]                      | Membrane proteins                                                                                       |                             |
| PA14_65630   | <i>PA14_65630</i> | 1.50                  | / [Putative aspartyl protease]                                                     | Putative enzymes                                                                                        |                             |
| PA14_66440   | <i>metY</i>       | -1.52                 | MetY / O-acetylhomoserine aminocarboxy-<br>propyltransferase                       | Amino acid biosynthesis and metabolism                                                                  | Amino acids                 |
| PA14_66540   | <i>PA14_66540</i> | -2.89                 | / Hypothetical protein                                                             | Hypothetical, unclassified, unknown                                                                     |                             |
| PA14_67350   | <i>hutU</i>       | -1.87                 | HutU / Urocanate hydratase                                                         | Amino acid biosynthesis and metabolism                                                                  | Amino acids                 |
| PA14_67510   | <i>estA</i>       | -1.58                 | EstA / Esterase                                                                    | Fatty acid and phospholipid metabolism                                                                  |                             |
| PA14_67620   | <i>PA14_67620</i> | 1.86                  | / Hypothetical protein                                                             | Hypothetical, unclassified, unknown                                                                     |                             |
| PA14_67640   | <i>PA14_67640</i> | -1.77                 | / Hypothetical protein                                                             | Hypothetical, unclassified, unknown                                                                     |                             |
| PA14_67830   | <i>PA14_67830</i> | -1.59                 | / Hypothetical protein                                                             | Hypothetical, unclassified, unknown                                                                     |                             |
| PA14_68260   | <i>PA14_68260</i> | -1.61                 | / C4-dicarboxylate-binding protein [DctP family]                                   | Membrane proteins                                                                                       |                             |
| PA14_68280   | <i>PA14_68280</i> | -1.74                 | / Dicarboxylate transporter [DctQ subunit]                                         | Membrane proteins; Transport of small                                                                   |                             |

| Locus      | Gene              | FC <sup>a</sup> | Product /Function <sup>b</sup> [function] <sup>c</sup>  | Protein Class Assignment <sup>d</sup>                                                               | Subclass <sup>d</sup> |
|------------|-------------------|-----------------|---------------------------------------------------------|-----------------------------------------------------------------------------------------------------|-----------------------|
| PA14_68290 | <i>PA14_68290</i> | -1.54           | / C4-dicarboxylate transporter [DctM subunit]           | Membrane proteins                                                                                   |                       |
| PA14_69380 | <i>PA14_69380</i> | -1.51           | / Peptidyl-prolyl cis-trans isomerase, FkbP-type        | Chaperones and heat shock proteins;<br>Translation, post-translational modification,<br>degradation |                       |
| PA14_70600 | <i>PA14_70600</i> | -1.88           | / HU family DNA-binding protein                         | DNA replication, recombination, modification<br>and repair                                          |                       |
| PA14_71070 | <i>PA14_71070</i> | -1.82           | / AraC family transcriptional regulator                 | Transcriptional regulators                                                                          |                       |
| PA14_71460 | <i>glyA1</i>      | -2.38           | GlyA1 / Serine hydroxymethyltransferase                 | Amino acid biosynthesis and metabolism                                                              | Amino acids           |
| PA14_71900 | <i>PA14_71900</i> | 1.60            | / Hypothetical protein                                  | Hypothetical, unclassified, unknown                                                                 |                       |
| PA14_72410 | <i>PA14_72410</i> | -1.80           | / Multiple antibiotic resistance (MarC-like)<br>protein | Antibiotic resistance and susceptibility                                                            |                       |
| PA14_72760 | <i>PA14_72760</i> | 1.63            | / Beta-lactamase                                        | Adaptation, protection; Antibiotic resistance                                                       |                       |
| PA14_73040 | <i>amiA</i>       | 3.00            | AmiA / N-acetylmuramoyl-L-alanine amidase               | Cell wall / LPS / capsule                                                                           |                       |
| PA14_73060 | <i>PA14_73060</i> | 2.63            | / Carbonic anhydrase-like protein                       | Transport of small molecules                                                                        |                       |

<sup>a</sup>Upregulation (green) and downregulation (red) of gene expression in PA14 grown in blood from SBPs or TPs compared to HVs

<sup>b</sup>Product /Function from UCBPP-PA14 Genome database

<sup>c</sup>[function from Pseudomonas Ortholog Database]

<sup>d</sup>From the PseudoCap database

<sup>e</sup>Genes highlighted in yellow were discussed in the text and/or figures

<http://pseudomonas.com/>

<http://pseudoluge.pseudomonas.com/>

<http://pseudomonas.com/pseudocap>
