# Supplementary material for: Pseudomonas aeruginosa Alters Its Transcriptome Related to Carbon Metabolism and Virulence as a Possible Survival Strategy in Blood from Trauma Patients
Source: PubMed Central journal article supplement (PMC6506614; doi:10.1128/msystems.00312-18), 2019-05-07
Supplement: mSystems.00312-18-st003.pdf [file mSystems.00312-18-st003.pdf]

**Table S3**

Differentially expressed predicted antisense RNA plus large and small RNA products.

| Start <sup>a</sup> | Stop <sup>b</sup> | Length | Strand | Product                             | FC <sup>c</sup> | q <sup>d</sup> | Comments        |
|--------------------|-------------------|--------|--------|-------------------------------------|-----------------|----------------|-----------------|
|                    |                   |        |        |                                     | ≥1.5<br>≥-1.5   | ≤0.05          |                 |
| 64255              | 63730             | 525    | -      | antisense: PA14_00630               | 2.4             | 2.8E-25        |                 |
| 328092             | 327954            | 138    | -      | antisense: PA14_03630               | -2.3            | 5.78E-08       |                 |
| 369305             | 369090            | 215    | -      | antisense: PA14_04100               | 3.0             | 2.01E-30       |                 |
| 653645             | 653892            | 247    | +      | antisense: PA14_07580               | 2.1             | 4.16E-19       |                 |
| 734616             | 733096            | 1520   | -      | antisense: PA14_08570 <sup>e</sup>  | 4.0             | 2.17E-138      | 16S rRNA        |
| 737953             | 735100            | 2853   | -      | antisense: PA14_08600               | 6.6             | 1.04E-291      | 23S rRNA        |
| 765237             | 764974            | 263    | -      | antisense: <i>rpIE</i>              | 2.9             | 5.59E-26       |                 |
| 775136             | 774767            | 369    | -      | antisense: <i>bfrA</i> <sup>f</sup> | 2.2             | 1.12E-17       | nc <sup>g</sup> |
| 775296             | 775611            | 315    | +      | antisense: <i>uvrA</i>              | 2.3             | 4.93E-20       |                 |
| 805283             | 805500            | 217    | +      | antisense: <b>phzS</b>              | -2.4            | 5.82E-12       | 1.9             |
| 1016946            | 1016918           | 28     | -      | antisense: PA14_11730               | -2.9            | 2.64E-07       |                 |
| 1053400            | 1053276           | 124    | -      | antisense: PA14_12170               | 3.0             | 1.03E-15       |                 |
| 1222942            | 1223625           | 683    | +      | antisense: PA14_14340               | -54.0           | 0.00E+00       | nc              |
| 1274815            | 1275275           | 460    | +      | antisense: <i>leuA</i>              | 3.6             | 5.35E-55       | -2.1            |
| 1522104            | 1521977           | 127    | -      | antisense: <i>rpmE2</i>             | 3.8             | 9.95E-30       |                 |
| 1836723            | 1837064           | 341    | +      | antisense: PA14_21220               | 6.0             | 3.89E-86       |                 |
| 1849687            | 1849567           | 120    | -      | antisense: <i>fadD2</i>             | 2.5             | 3.15E-09       |                 |
| 1863998            | 1863886           | 112    | -      | antisense: PA14_21490               | 2.0             | 6.42E-07       |                 |
| 1870523            | 1870313           | 210    | -      | antisense: PA14_21570               | 6.0             | 1.57E-144      | 3.0             |
|                    |                   |        |        | PA14_21580                          |                 |                | 2.8             |
| 1902333            | 1902404           | 71     | +      | antisense: <i>tsp</i>               | 6.0             | 4.75E-46       |                 |
| 1905417            | 1905055           | 362    | -      | antisense: <b>PA14_21890</b>        | 3.2             | 8.70E-48       | nc              |
| 1962801            | 1962597           | 204    | -      | antisense: PA14_22550               | 2.2             | 6.91E-12       |                 |
| 1962801            | 1962597           | 204    | -      | antisense: PA14_22550               | 2.2             | 6.91E-12       |                 |
| 2120706            | 2120697           | 9      | -      | antisense: PA14_24360               | 2.4             | 6.18E-06       |                 |
| 2153404            | 2153293           | 111    | -      | antisense: PA14_24630               | 2.0             | 1.00E-06       |                 |
| 2190534            | 2190794           | 260    | +      | antisense: PA14_25040               | 2.0             | 6.52E-11       |                 |
| 2194052            | 2193777           | 275    | -      | antisense: <i>fadB</i>              | 2.3             | 8.09E-14       |                 |
| 2204351            | 2204396           | 45     | +      | antisense: PA14_25220               | 2.0             | 1.45E-03       |                 |
| 2320151            | 2320248           | 97     | +      | antisense: PA14_26640               | 3.0             | 7.74E-16       |                 |
| 2356351            | 2356217           | 134    | -      | antisense: PA14_27120               | 2.0             | 4.34E-09       |                 |
| 2360088            | 2360104           | 16     | +      | antisense: PA14_27150               | -2.3            | 8.91E-04       |                 |
| 2802689            | 2803426           | 737    | +      | antisense: PA14_32250               | 4.3             | 2.45E-204      | 5.2             |
| 3009991            | 3010452           | 461    | +      | antisense: PA14_33870               | 2.3             | 3.55E-36       | 1.8             |
| 3084412            | 3086372           | 1960   | +      | antisense: PA14_34720               | 7.1             | 0.00E+00       |                 |
|                    |                   |        |        | PA14_34730 PA14_34740               |                 |                |                 |
| 3239166            | 3239282           | 116    | +      | antisense: PA14_36370               | 2.0             | 5.16E-06       |                 |
| 3418139            | 3417966           | 173    | -      | antisense: PA14_38340               | 3.3             | 3.02E-27       |                 |
| 3484578            | 3484761           | 183    | +      | antisense: PA14_39100               | -2.1            | 4.01E-06       |                 |
| 3518240            | 3518513           | 273    | +      | antisense: PA14_39520               | -22.0           | 0.00E+00       | nc              |
| 3612543            | 3612599           | 56     | +      | antisense: PA14_40430               | 2.9             | 7.30E-09       |                 |
| 3656240            | 3656520           | 280    | +      | antisense: PA14_41010               | 2.1             | 1.34E-11       |                 |
| 3686273            | 3686214           | 59     | -      | antisense: PA14_41290               | 2.2             | 2.17E-05       |                 |
| 3739392            | 3739278           | 114    | -      | antisense: PA14_41860               | 2.0             | 3.96E-07       |                 |
| 3854106            | 3853766           | 340    | -      | antisense: PA14_43250               | 2.4             | 6.44E-19       |                 |
| 3924407            | 3924741           | 334    | +      | antisense: PA14_44080               | 2.1             | 1.36E-15       |                 |

|         |         |      |   |                                                              |            |           |                                                 |
|---------|---------|------|---|--------------------------------------------------------------|------------|-----------|-------------------------------------------------|
| 3924510 | 3924046 | 464  | - | antisense: <i>gltA</i>                                       | 2.0        | 1.27E-12  |                                                 |
| 4049209 | 4048834 | 375  | - | antisense: <b>PA14_45470</b>                                 | <b>2.0</b> | 1.46E-11  |                                                 |
| 4492049 | 4491818 | 231  | - | antisense: <i>braG</i>                                       | -2.3       | 6.21E-08  |                                                 |
| 4563787 | 4562873 | 914  | - | antisense: <b><i>mvfR</i></b>                                | <b>3.0</b> | 6.19E-58  | nc                                              |
| 4625023 | 4624794 | 229  | - | antisense: <i>lpxO2</i>                                      | -2.2       | 1.10E-08  |                                                 |
| 4695835 | 4695098 | 737  | - | antisense: PA14_52940                                        | 2.0        | 3.53E-16  |                                                 |
| 4808699 | 4809117 | 418  | + | antisense: <i>pruR</i>                                       | 2.6        | 6.63E-37  |                                                 |
| 4952318 | 4957474 | 5156 | + | antisense: PA14_55631<br>PA14_55634 PA14_55635<br>PA14_55637 | 6.0        | 3.25E-275 | 23S rRNA;<br>tRNA-Ala;<br>tRNA-Ile;<br>16S rRNA |
| 5060140 | 5060202 | 62   | + | antisense: PA14_56800                                        | -2.3       | 1.14E-04  |                                                 |
| 5266416 | 5266240 | 176  | - | antisense: PA14_59140<br>PA14_59150                          | 3.3        | 8.44E-27  |                                                 |
| 5350100 | 5349555 | 545  | - | antisense: PA14_60070                                        | 3.4        | 5.17E-74  |                                                 |
| 5384678 | 5385115 | 437  | + | antisense: PA14_60390                                        | 2.3        | 8.14E-24  |                                                 |
| 5399019 | 5398890 | 129  | - | antisense: PA14_60570                                        | 5.5        | 6.14E-47  |                                                 |
| 5474606 | 5474583 | 23   | - | antisense: PA14_61300                                        | -2.2       | 7.49E-04  |                                                 |
| 5536325 | 5539178 | 2853 | + | antisense: PA14_62060                                        | 6.6        | 4.75E-292 | 23S rRNA                                        |
| 5539662 | 5541182 | 1520 | + | antisense: PA14_62090                                        | 4.0        | 2.17E-138 | 16S rRNA                                        |
| 5608393 | 5608523 | 130  | + | antisense: <i>ftsH</i>                                       | 4.0        | 5.86E-32  |                                                 |
| 5714456 | 5714335 | 121  | - | antisense: <i>accC</i>                                       | 2.1        | 3.04E-07  |                                                 |
| 6140565 | 6140680 | 115  | + | antisense: <i>gcvP1</i>                                      | 2.2        | 7.33E-10  |                                                 |
| 6154122 | 6154310 | 188  | + | antisense: <i>pepP</i>                                       | -18.0      | 0.00E+00  | nc                                              |
| 6312796 | 6315649 | 2853 | + | antisense: PA14_70880                                        | 6.6        | 1.04E-291 | 23S rRNA                                        |
| 6316133 | 6317653 | 1520 | + | antisense: PA14_70910                                        | 4.0        | 2.17E-138 | 16S rRNA                                        |
| 6356929 | 6356474 | 455  | - | antisense: PA14_71350<br>PA14_71360                          | -2.9       | 3.27E-20  |                                                 |
| 6382634 | 6382509 | 125  | - | antisense: <i>aspA</i>                                       | -2.8       | 3.22E-08  |                                                 |
| 2786835 | 2787657 | 822  | + | sense: PA14_32015 <sup>h</sup>                               | 6.6        | 0.00E+00  | CzcA amino<br>terminus                          |
| 2787806 | 2789915 | 2109 | + | sense: PA14_32025                                            | 6.2        | 0.00E+00  | CzcA<br>carboxy<br>terminus                     |
| 57035   | 57139   | 104  | + | -                                                            | 2.3        | 1.94E-06  |                                                 |
| 61368   | 61149   | 219  | - | -                                                            | -3.0       | 1.51E-26  |                                                 |
| 200534  | 200500  | 34   | - | -                                                            | -2.4       | 5.66E-04  |                                                 |
| 226488  | 226476  | 12   | - | -                                                            | -2.3       | 1.83E-04  |                                                 |
| 244004  | 243946  | 58   | - | -                                                            | 3.0        | 6.27E-08  |                                                 |
| 249913  | 249934  | 21   | + | -                                                            | -4.6       | 1.70E-28  |                                                 |
| 269220  | 269202  | 18   | - | -                                                            | 3.3        | 1.79E-18  |                                                 |
| 279717  | 279566  | 151  | - | -                                                            | 2.0        | 1.78E-07  |                                                 |
| 309605  | 309748  | 143  | + | -                                                            | 4.8        | 7.12E-32  |                                                 |
| 329965  | 329956  | 9    | - | -                                                            | 2.3        | 1.02E-05  |                                                 |
| 330918  | 330785  | 133  | - | -                                                            | 2.0        | 2.76E-17  |                                                 |
| 332114  | 331962  | 152  | - | -                                                            | 2.5        | 2.68E-48  |                                                 |
| 374503  | 374521  | 18   | + | -                                                            | 2.7        | 8.99E-09  |                                                 |
| 377253  | 377028  | 225  | - | -                                                            | -3.6       | 1.89E-19  |                                                 |

|         |         |     |   |       |      |           |
|---------|---------|-----|---|-------|------|-----------|
| 384642  | 384575  | 67  | - | -     | -2.6 | 2.50E-05  |
| 403447  | 403506  | 59  | + | -     | 2.1  | 1.72E-07  |
| 458075  | 457976  | 99  | - | -     | 3.0  | 3.46E-14  |
| 481583  | 481492  | 91  | - | -     | -2.3 | 2.65E-05  |
| 514654  | 514466  | 188 | - | -     | 2.3  | 1.20E-21  |
| 564678  | 564698  | 20  | + | -     | -2.8 | 1.51E-07  |
| 565458  | 565533  | 75  | + | -     | -5.7 | 4.86E-41  |
| 565783  | 565792  | 9   | + | -     | -2.6 | 3.94E-08  |
| 610279  | 610210  | 69  | - | -     | 2.4  | 2.41E-09  |
| 634868  | 634779  | 89  | - | -     | 2.3  | 3.78E-08  |
| 673111  | 673135  | 24  | + | -     | 3.0  | 7.68E-11  |
| 784463  | 784623  | 160 | + | -     | -2.0 | 3.05E-06  |
| 799927  | 800011  | 84  | + | -     | -2.8 | 3.88E-54  |
| 802613  | 802792  | 179 | + | -     | -2.5 | 2.84E-09  |
| 805206  | 805216  | 10  | + | -     | -2.1 | 3.49E-04  |
| 806855  | 806528  | 327 | - | -     | 5.0  | 7.65E-100 |
| 807525  | 807504  | 21  | - | -     | 6.0  | 1.15E-63  |
| 808375  | 808363  | 12  | - | -     | 2.0  | 6.25E-05  |
| 813422  | 813136  | 286 | - | -     | 2.3  | 6.65E-23  |
| 840541  | 840449  | 92  | - | -     | 3.8  | 2.89E-21  |
| 906820  | 906724  | 96  | - | -     | 4.8  | 1.12E-29  |
| 908551  | 908647  | 96  | + | -     | 3.1  | 2.23E-18  |
| 933885  | 933825  | 60  | - | -     | 3.8  | 1.30E-50  |
| 1042855 | 1042885 | 30  | + | -     | 2.4  | 4.88E-05  |
| 1107375 | 1107457 | 82  | + | -     | 2.3  | 4.16E-08  |
| 1117707 | 1117870 | 163 | + | -     | 2.0  | 1.01E-14  |
| 1210068 | 1210133 | 65  | + | -     | 2.0  | 7.89E-05  |
| 1310747 | 1310736 | 11  | - | -     | 2.1  | 2.76E-04  |
| 1334440 | 1334545 | 105 | + | -     | 2.8  | 3.02E-11  |
| 1349852 | 1349837 | 15  | - | -     | -2.0 | 4.94E-03  |
| 1384119 | 1384136 | 17  | + | -     | -2.1 | 2.22E-05  |
| 1437572 | 1437554 | 18  | - | -     | 2.2  | 5.02E-04  |
| 1455960 | 1455934 | 26  | - | -     | -3.8 | 1.01E-16  |
| 1477571 | 1477600 | 29  | + | -     | 2.8  | 2.65E-07  |
| 1492951 | 1493022 | 71  | + | -     | -2.2 | 4.88E-03  |
| 1505272 | 1505293 | 21  | + | -     | -2.0 | 4.32E-03  |
| 1545244 | 1545205 | 39  | - | -     | -2.1 | 2.23E-03  |
| 1561325 | 1561359 | 34  | + | -     | 3.6  | 3.31E-18  |
| 1597096 | 1596991 | 105 | - | -     | 2.0  | 2.51E-06  |
| 1599848 | 1599983 | 135 | + | RealL | 2.0  | 4.03E-09  |
| 1635661 | 1635234 | 427 | - | -     | -2.1 | 1.04E-22  |
| 1648377 | 1648572 | 195 | + | -     | 2.1  | 1.11E-20  |
| 1676713 | 1676674 | 39  | - | -     | 2.1  | 3.94E-04  |
| 1685556 | 1685652 | 96  | + | -     | 2.8  | 2.66E-46  |
| 1689131 | 1689248 | 117 | + | -     | 3.2  | 6.16E-38  |
| 1699602 | 1699715 | 113 | + | -     | 2.0  | 7.38E-05  |
| 1725316 | 1725523 | 207 | + | -     | -3.2 | 2.00E-28  |
| 1736707 | 1736732 | 25  | + | -     | -2.6 | 3.18E-05  |
| 1749126 | 1749177 | 51  | + | -     | 7.4  | 7.42E-94  |
| 1750183 | 1750249 | 66  | + | -     | 14.5 | 0.00E+00  |
| 1870104 | 1870121 | 17  | + | -     | 2.7  | 3.52E-15  |
| 1872668 | 1872899 | 231 | + | -     | 3.2  | 1.40E-64  |

|         |         |     |   |   |      |           |
|---------|---------|-----|---|---|------|-----------|
| 1887235 | 1887202 | 33  | - | - | 2.2  | 1.06E-04  |
| 1934976 | 1934915 | 61  | - | - | 3.6  | 4.10E-17  |
| 1978119 | 1978012 | 107 | - | - | 2.0  | 3.37E-07  |
| 1983463 | 1983606 | 143 | + | - | 2.1  | 1.46E-11  |
| 1993611 | 1993668 | 57  | + | - | -2.0 | 1.59E-03  |
| 2025890 | 2025947 | 57  | + | - | 2.7  | 6.33E-13  |
| 2045697 | 2045716 | 19  | + | - | -3.3 | 6.61E-13  |
| 2253608 | 2253666 | 58  | + | - | 2.1  | 1.80E-05  |
| 2275154 | 2275079 | 75  | - | - | -2.1 | 4.22E-05  |
| 2303834 | 2303550 | 284 | - | - | 2.5  | 4.38E-29  |
| 2362094 | 2362489 | 395 | + | - | 2.7  | 6.32E-32  |
| 2388350 | 2388427 | 77  | + | - | 2.1  | 8.61E-22  |
| 2411667 | 2411678 | 11  | + | - | 5.3  | 1.59E-44  |
| 2411892 | 2411937 | 45  | + | - | 7.4  | 1.31E-85  |
| 2417927 | 2417943 | 16  | + | - | 2.1  | 1.37E-04  |
| 2423522 | 2423639 | 117 | + | - | 3.6  | 5.52E-17  |
| 2436434 | 2436421 | 13  | - | - | -2.1 | 7.44E-05  |
| 2455743 | 2455780 | 37  | + | - | -4.0 | 1.68E-22  |
| 2492542 | 2492412 | 130 | - | - | 2.7  | 4.14E-14  |
| 2538176 | 2538038 | 138 | - | - | -2.3 | 3.94E-11  |
| 2644422 | 2644482 | 60  | + | - | 3.6  | 2.90E-15  |
| 2667798 | 2667876 | 78  | + | - | 2.3  | 4.39E-16  |
| 2670884 | 2670869 | 15  | - | - | 2.2  | 2.17E-04  |
| 2730130 | 2730149 | 19  | + | - | -2.6 | 3.91E-05  |
| 2745826 | 2745686 | 140 | - | - | -2.2 | 5.98E-06  |
| 2757997 | 2758085 | 88  | + | - | -2.2 | 3.31E-14  |
| 2783778 | 2783529 | 249 | - | - | 4.7  | 1.62E-81  |
| 2785328 | 2785379 | 51  | + | - | 9.5  | 1.26E-115 |
| 2802845 | 2802731 | 114 | - | - | 7.8  | 1.27E-138 |
| 2888995 | 2889136 | 141 | + | - | -2.9 | 8.00E-18  |
| 2908551 | 2908568 | 17  | + | - | 2.3  | 2.05E-05  |
| 2912026 | 2912098 | 72  | + | - | -2.0 | 1.84E-11  |
| 2925194 | 2925332 | 138 | + | - | 2.0  | 2.31E-08  |
| 2948952 | 2948991 | 39  | + | - | -2.6 | 4.03E-20  |
| 3014294 | 3014188 | 106 | - | - | 2.4  | 2.95E-09  |
| 3038665 | 3038697 | 32  | + | - | 2.6  | 8.13E-07  |
| 3058178 | 3058157 | 21  | - | - | 6.8  | 5.38E-85  |
| 3059330 | 3059292 | 38  | - | - | 10.3 | 1.01E-245 |
| 3060174 | 3060165 | 9   | - | - | 16.0 | 0.00E+00  |
| 3062547 | 3062494 | 53  | - | - | 7.6  | 2.21E-117 |
| 3075621 | 3075597 | 24  | - | - | 2.6  | 6.85E-06  |
| 3216785 | 3216766 | 19  | - | - | -4.5 | 2.93E-21  |
| 3224444 | 3224524 | 80  | + | - | -2.2 | 5.54E-04  |
| 3230291 | 3230204 | 87  | - | - | 2.2  | 4.62E-11  |
| 3232595 | 3232552 | 43  | - | - | 2.6  | 3.95E-10  |
| 3236469 | 3236397 | 72  | - | - | 2.6  | 8.67E-16  |
| 3246608 | 3246619 | 11  | + | - | 4.5  | 1.87E-39  |
| 3249928 | 3249796 | 132 | - | - | 2.5  | 4.57E-14  |
| 3318288 | 3318311 | 23  | + | - | -2.4 | 5.12E-04  |
| 3319542 | 3319571 | 29  | + | - | -2.7 | 4.38E-05  |
| 3347302 | 3347402 | 100 | + | - | -3.8 | 1.79E-13  |
| 3426030 | 3426062 | 32  | + | - | 3.3  | 2.54E-12  |

|         |         |     |   |       |      |           |
|---------|---------|-----|---|-------|------|-----------|
| 3441642 | 3441742 | 100 | + | -     | 2.1  | 9.54E-09  |
| 3512853 | 3513092 | 239 | + | -     | -2.1 | 2.17E-07  |
| 3546312 | 3546402 | 90  | + | -     | 2.4  | 2.15E-10  |
| 3556128 | 3556107 | 21  | - | -     | 6.0  | 1.15E-63  |
| 3556978 | 3556966 | 12  | - | -     | 2.0  | 6.25E-05  |
| 3630810 | 3630859 | 49  | + | -     | -2.1 | 8.32E-03  |
| 3738075 | 3738049 | 26  | - | -     | 2.0  | 2.38E-07  |
| 3897277 | 3897483 | 206 | + | -     | -2.0 | 5.09E-12  |
| 3959448 | 3959561 | 113 | + | -     | 2.7  | 1.07E-14  |
| 3990202 | 3990270 | 68  | + | -     | -2.9 | 1.13E-08  |
| 3992674 | 3992782 | 108 | + | -     | -2.2 | 5.52E-10  |
| 3997582 | 3997635 | 53  | + | -     | -3.5 | 8.01E-19  |
| 4014792 | 4014865 | 73  | + | -     | -3.5 | 1.35E-17  |
| 4027326 | 4027728 | 402 | + | -     | -2.1 | 1.90E-10  |
| 4146755 | 4146825 | 70  | + | -     | 2.1  | 5.19E-05  |
| 4178838 | 4179010 | 172 | + | -     | -2.4 | 2.66E-24  |
| 4182929 | 4182999 | 70  | + | -     | -2.1 | 1.11E-18  |
| 4198208 | 4197971 | 237 | - | -     | 2.5  | 1.12E-47  |
| 4279322 | 4279182 | 140 | - | -     | 2.0  | 4.72E-10  |
| 4285964 | 4286194 | 230 | + | -     | -5.6 | 7.20E-172 |
| 4401009 | 4401134 | 125 | + | -     | 2.0  | 1.87E-07  |
| 4417716 | 4417839 | 123 | + | -     | -2.0 | 3.29E-04  |
| 4428274 | 4428241 | 33  | - | -     | 2.1  | 5.57E-05  |
| 4485828 | 4485653 | 175 | - | -     | 2.0  | 7.69E-12  |
| 4491974 | 4492001 | 27  | + | -     | -3.3 | 9.43E-10  |
| 4568030 | 4568008 | 22  | - | -     | 2.0  | 1.23E-15  |
| 4571549 | 4571522 | 27  | - | -     | 2.1  | 5.20E-04  |
| 4736602 | 4736563 | 39  | - | -     | 2.0  | 1.82E-09  |
| 4743227 | 4743250 | 23  | + | -     | 3.2  | 1.61E-12  |
| 4774596 | 4774449 | 147 | - | -     | -3.7 | 1.49E-36  |
| 4787163 | 4787256 | 93  | + | -     | -2.3 | 2.20E-03  |
| 4801008 | 4801020 | 12  | + | -     | -3.1 | 4.66E-12  |
| 4806518 | 4806629 | 111 | + | -     | 2.4  | 1.03E-15  |
| 4835040 | 4835068 | 28  | + | -     | 2.1  | 1.45E-04  |
| 4861607 | 4861446 | 161 | - | -     | 2.6  | 4.34E-23  |
| 4888811 | 4888903 | 92  | + | -     | -2.6 | 2.41E-31  |
| 4900204 | 4900284 | 80  | + | -     | -3.1 | 8.02E-11  |
| 5007181 | 5007215 | 34  | + | -     | -2.3 | 2.50E-06  |
| 5029936 | 5029844 | 92  | - | -     | -3.3 | 8.21E-11  |
| 5047121 | 5047156 | 35  | + | -     | -2.2 | 6.60E-03  |
| 5119903 | 5120244 | 341 | + | -     | 2.0  | 1.11E-20  |
| 5174418 | 5174330 | 88  | - | -     | 2.6  | 1.58E-14  |
| 5177144 | 5177056 | 88  | - | -     | -2.6 | 1.03E-05  |
| 5264754 | 5264995 | 241 | + | -     | 2.0  | 5.85E-11  |
| 5292645 | 5292764 | 119 | + | -     | -2.1 | 4.92E-09  |
| 5347847 | 5347968 | 121 | + | -     | -2.0 | 2.01E-05  |
| 5370203 | 5370018 | 185 | - | -     | 3.2  | 8.81E-24  |
| 5388487 | 5388379 | 108 | - | -     | 2.1  | 5.86E-10  |
| 5398440 | 5398591 | 151 | + | -     | 2.1  | 3.34E-10  |
| 5521532 | 5521511 | 21  | - | -     | -2.4 | 4.52E-04  |
| 5556009 | 5555936 | 73  | - | PrrF1 | 9.3  | 1.48E-113 |
| 5563443 | 5563544 | 101 | + | -     | 3.6  | 3.07E-23  |

|         |         |     |   |   |      |          |
|---------|---------|-----|---|---|------|----------|
| 5654193 | 5654308 | 115 | + | - | 2.2  | 4.30E-12 |
| 5673607 | 5673586 | 21  | - | - | -4.7 | 5.72E-35 |
| 5732048 | 5732159 | 111 | + | - | -3.0 | 3.50E-07 |
| 5739000 | 5738964 | 36  | - | - | 3.6  | 1.71E-22 |
| 5749614 | 5749550 | 64  | - | - | 6.6  | 1.21E-58 |
| 5789169 | 5789188 | 19  | + | - | -3.1 | 5.85E-12 |
| 6010689 | 6010573 | 116 | - | - | -2.5 | 4.80E-05 |
| 6012155 | 6012094 | 61  | - | - | -2.8 | 2.76E-07 |
| 6015331 | 6015225 | 106 | - | - | -3.0 | 6.09E-29 |
| 6017106 | 6017012 | 94  | - | - | -2.1 | 4.84E-05 |
| 6036887 | 6036877 | 10  | - | - | 2.3  | 2.35E-05 |
| 6043146 | 6043189 | 43  | + | - | -2.6 | 1.77E-05 |
| 6059019 | 6058871 | 148 | - | - | -2.1 | 3.03E-10 |
| 6224090 | 6224069 | 21  | - | - | 3.0  | 4.54E-12 |
| 6258847 | 6258866 | 19  | + | - | 2.2  | 1.11E-04 |
| 6298198 | 6298223 | 25  | + | - | 3.6  | 1.04E-19 |
| 6348125 | 6348178 | 53  | + | - | -3.5 | 6.27E-11 |
| 6348782 | 6348796 | 14  | + | - | -2.5 | 2.11E-05 |
| 6372966 | 6373058 | 92  | + | - | -2.6 | 1.87E-12 |
| 6374602 | 6374807 | 205 | + | - | -2.2 | 4.66E-08 |
| 6382150 | 6382164 | 14  | + | - | -2.6 | 5.22E-07 |
| 6460839 | 6461078 | 239 | + | - | 2.8  | 1.94E-26 |

<sup>a</sup>Transcriptional start site

<sup>b</sup>Transcriptional stop site

<sup>c</sup>Each fold change value represents the average expression of each RNA in PA14 grown in the blood of the TPs/HvS; upregulated RNAs, red; downregulated RNAs, green.

<sup>d</sup>*q* value of HVs versus TPs in scientific notation as all values are 0.00 in numeric form.

<sup>e</sup>Yellow-highlighted asRNAs are discussed in the text.

<sup>f</sup>Bolded transcripts were also found in the 2018 study by Eckweiler and Häussler.

<sup>g</sup>Change in gene expression; red, upregulated; green, downregulated; nc, no significant change.

<sup>h</sup>Transcripts encoding the potential amino and carboxy termini of CzcA are highlighted in blue.
