# Supplementary material for: Pseudomonas aeruginosa Alters Its Transcriptome Related to Carbon Metabolism and Virulence as a Possible Survival Strategy in Blood from Trauma Patients
Source: PubMed Central journal article supplement (PMC6506614; doi:10.1128/msystems.00312-18), 2019-05-07
Supplement: mSystems.00312-18-st004.pdf [file mSystems.00312-18-st004.pdf]

**Table S4**

PA14 genes differentially expressed in blood from severely burned patients (SBPs) and TPs.

| Locus                         | Gene <sup>b</sup>  | Product                                                | Fold-Change <sup>a</sup> |              |
|-------------------------------|--------------------|--------------------------------------------------------|--------------------------|--------------|
|                               |                    |                                                        | SBPs                     | TPs          |
| <b>PA14_02570<sup>c</sup></b> | <b><i>mdcC</i></b> | <b>malonate decarboxylase subunit delta</b>            | <b>11.63</b>             | <b>6.00</b>  |
| <b>PA14_02550</b>             | <b><i>mdcA</i></b> | <b>malonate decarboxylase subunit alpha</b>            | <b>12.13</b>             | <b>5.86</b>  |
| <b>PA14_02560</b>             |                    | <b>triphosphoribosyl-dephospho-CoA synthase</b>        | <b>20.73</b>             | <b>4.20</b>  |
| <b>PA14_02590</b>             | <b><i>mdcE</i></b> | <b>malonate decarboxylase subunit gamma</b>            | <b>8.54</b>              | <b>4.00</b>  |
| <b>PA14_02580</b>             | <b><i>mdcD</i></b> | <b>malonate decarboxylase subunit beta</b>             | <b>13.17</b>             | <b>3.00</b>  |
| PA14_33860                    | <i>lldA</i>        | L-lactate dehydrogenase                                | 3.65                     | 1.85         |
| PA14_58130                    | <i>mreC</i>        | rod shape-determining protein MreC                     | 2.53                     | 1.78         |
| PA14_45350                    | <i>ccmC</i>        | heme exporter protein CcmC                             | 5.37                     | 1.77         |
| PA14_38500                    |                    | IclR family transcriptional regulator                  | 7.23                     | 1.65         |
| PA14_49850                    |                    | hypothetical protein                                   | 3.63                     | 1.53         |
| PA14_17340                    | <i>ispD</i>        | 2-C-Methyl-D-erythritol 4-phosphate cytidyltransferase | 2.94                     | 1.52         |
| PA14_46930                    |                    | ABC transporter permease                               | -4.28                    | -1.52        |
| PA14_66440                    | <i>metY</i>        | O-acetylhomoserine aminocarboxypropyltransferase       | -4.75                    | -1.52        |
| <b>PA14_62130</b>             | <b><i>ilvC</i></b> | <b>ketol-acid reductoisomerase</b>                     | <b>-2.77</b>             | <b>-1.54</b> |
| PA14_46920                    |                    | ABC transporter permease                               | -3.27                    | -1.54        |
| PA14_33520                    |                    | thioesterase                                           | -2.12                    | -1.55        |
| <b>PA14_33680</b>             | <b><i>fpvA</i></b> | <b>ferripyoverdine receptor</b>                        | <b>-4.34</b>             | <b>-1.56</b> |
| PA14_44710                    | <i>xdhA</i>        | xanthine dehydrogenase                                 | -4.43                    | -1.56        |
| PA14_27520                    |                    | glutathione peroxidase                                 | -4.16                    | -1.56        |
| PA14_67510                    | <i>estA</i>        | esterase EstA                                          | -2.20                    | -1.58        |
| PA14_17930                    | <i>glpD</i>        | glycerol-3-phosphate dehydrogenase                     | -11.76                   | -1.60        |
| <b>PA14_26020</b>             |                    | <b>aminopeptidase</b>                                  | <b>-4.08</b>             | <b>-1.63</b> |
| PA14_46950                    |                    | ABC transporter ATP-binding protein                    | -5.37                    | -1.63        |
| PA14_17720                    |                    | LuxR family transcriptional regulator                  | -2.93                    | -1.67        |
| PA14_37590                    | <i>kynB</i>        | kynurenine formamidase, KynB                           | -2.06                    | -1.69        |
| PA14_44860                    |                    | ureidoglycolate hydrolase                              | -3.57                    | -1.69        |
| PA14_44830                    |                    | hypothetical protein                                   | -5.50                    | -1.69        |
| <b>PA14_62150</b>             | <b><i>ilvH</i></b> | <b>acetolactate synthase 3 regulatory subunit</b>      | <b>-2.35</b>             | <b>-1.70</b> |
| PA14_17980                    | <i>glpF</i>        | glycerol uptake facilitator protein                    | -6.06                    | -1.71        |
| PA14_49320                    |                    | hypothetical protein                                   | -2.76                    | -1.71        |
| <b>PA14_33720</b>             | <b><i>pvdN</i></b> | <b>protein PvdN</b>                                    | <b>-2.45</b>             | <b>-1.72</b> |
| PA14_44850                    | <i>alc</i>         | allantoicase                                           | -3.89                    | -1.72        |
| PA14_44840                    |                    | hypothetical protein                                   | -5.33                    | -1.73        |
| PA14_02260                    |                    | two-component response regulator                       | -2.09                    | -1.73        |

|                   |                    |                                                            |              |              |
|-------------------|--------------------|------------------------------------------------------------|--------------|--------------|
| PA14_16840        |                    | lipoprotein                                                | -2.09        | -1.74        |
| PA14_50610        |                    | short chain dehydrogenase                                  | -2.13        | -1.78        |
| PA14_27100        | <i>lipA</i>        | lactonizing lipase                                         | -2.00        | -1.78        |
| PA14_71070        |                    | AraC family transcriptional regulator                      | -2.27        | -1.82        |
| <b>PA14_33710</b> | <b><i>pvdO</i></b> | <b>protein PvdO</b>                                        | <b>-4.71</b> | <b>-1.83</b> |
| PA14_37250        |                    | major facilitator transporter                              | -8.50        | -1.86        |
| <b>PA14_33700</b> | <b><i>pvdF</i></b> | <b>pyoverdine synthetase F</b>                             | <b>-4.94</b> | <b>-1.89</b> |
| PA14_29330        |                    | hypothetical protein                                       | -5.47        | -1.91        |
| PA14_13140        |                    | hypothetical protein                                       | -2.17        | -1.93        |
| PA14_54630        |                    | acyl-CoA dehydrogenase                                     | -2.14        | -1.93        |
| <b>PA14_46960</b> | <b><i>ggt</i></b>  | <b>gamma-glutamyltranspeptidase</b>                        | <b>-3.88</b> | <b>-1.94</b> |
| PA14_46910        |                    | ABC transporter substrate-binding protein                  | -5.63        | -1.97        |
| PA14_34050        |                    | hypothetical protein                                       | -2.57        | -2.00        |
| <b>PA14_33690</b> | <b><i>pvdE</i></b> | <b>pyoverdine biosynthesis protein PvdE</b>                | <b>-2.36</b> | <b>-2.11</b> |
| <b>PA14_33810</b> | <b><i>pvdA</i></b> | <b>L-ornithine N5-oxygenase</b>                            | <b>-3.81</b> | <b>-2.27</b> |
| PA14_20010        | <i>hasR</i>        | heme uptake outer membrane receptor HasR                   | -11.80       | -2.27        |
| <b>PA14_46970</b> | <b><i>ansB</i></b> | <b>glutaminase-asparaginase</b>                            | <b>-5.99</b> | <b>-2.29</b> |
| PA14_32905        |                    | hypothetical protein                                       | -4.56        | -2.32        |
| PA14_02520        |                    | hypothetical protein                                       | -6.35        | -2.34        |
| <b>PA14_33500</b> | <b><i>pvdH</i></b> | <b>diaminobutyrate--2-oxoglutarate aminotransferase</b>    | <b>-4.61</b> | <b>-2.35</b> |
| PA14_44880        |                    | hypothetical protein                                       | -2.89        | -2.43        |
| PA14_34030        |                    | hypothetical protein                                       | -2.64        | -2.67        |
| PA14_25980        | <i>aroF</i>        | phospho-2-dehydro-3-deoxyheptonate aldolase                | -2.18        | -2.90        |
| PA14_06420        |                    | hypothetical protein                                       | -8.60        | -3.09        |
| PA14_06430        |                    | hypothetical protein                                       | -15.29       | -3.15        |
| PA14_34370        |                    | ABC maltose/mannitol transporter ATP-binding protein       | -2.80        | 9.60         |
| PA14_21610        | <i>oprO</i>        | pyrophosphate-specific outer membrane porin OprO precursor | -41.78       | 4.92         |
| PA14_20390        | <i>phnJ</i>        | hypothetical protein                                       | -175.14      | 4.75         |
| PA14_21600        |                    | hypothetical protein                                       | -2.20        | 4.18         |
| PA14_19530        |                    | NAD(P)H-dependent FMN reductase                            | -164.25      | 3.11         |
| PA14_13010        |                    | hypothetical protein                                       | -27.50       | 3.08         |
| PA14_73040        | <i>amiA</i>        | N-acetylmuramoyl-L-alanine amidase                         | -12.59       | 3.00         |
| PA14_21570        |                    | hypothetical protein                                       | -3.04        | 2.99         |
| PA14_19680        |                    | hypothetical protein                                       | -20.75       | 2.67         |
| PA14_73060        |                    | hypothetical protein                                       | -11.19       | 2.63         |
| PA14_19490        |                    | antioxidant protein                                        | -215.29      | 2.37         |
| PA14_19100        | <i>rhIA</i>        | rhamnosyltransferase chain A                               | -4.02        | 2.31         |
| PA14_03710        | -                  | hypothetical protein                                       | -139.59      | 2.04         |

|                   |                     |                                                                        |              |              |
|-------------------|---------------------|------------------------------------------------------------------------|--------------|--------------|
| PA14_03700        | <i>sbp</i>          | sulfate-binding protein                                                | -65.56       | 2.02         |
| PA14_07355        | -                   | hypothetical protein                                                   | -2.79        | 1.93         |
| PA14_59390        | -                   | hypothetical protein                                                   | -2.31        | 1.92         |
| PA14_15350        |                     | integrase                                                              | -2.44        | 1.88         |
| PA14_48140        |                     | hypothetical protein                                                   | -16.37       | 1.86         |
| PA14_31580        |                     | acyl-CoA dehydrogenase                                                 | -3.61        | 1.83         |
| PA14_36290        |                     | hypothetical protein                                                   | -4.43        | 1.82         |
| PA14_53820        |                     | hypothetical protein                                                   | -2.28        | 1.79         |
| PA14_53400        |                     | oxidoreductase                                                         | -2.04        | 1.72         |
| <b>PA14_48060</b> | <b><i>aprA</i></b>  | <b>alkaline metalloproteinase</b>                                      | <b>-4.71</b> | <b>1.67</b>  |
| PA14_56360        |                     | hypothetical protein                                                   | -8.61        | 1.65         |
| PA14_59970        |                     | hypothetical protein                                                   | -2.77        | 1.61         |
| PA14_30800        |                     | hypothetical protein                                                   | -5.86        | 1.60         |
| PA14_71900        |                     | hypothetical protein                                                   | -4.07        | 1.60         |
| PA14_34600        |                     | glyceraldehyde-3-phosphate dehydrogenase                               | -2.36        | 1.52         |
| PA14_02530        |                     | hypothetical protein                                                   | -29.81       | 1.50         |
| PA14_19020        |                     | hypothetical protein                                                   | 2.14         | -1.52        |
| PA14_06920        |                     | class III pyridoxal phosphate-dependent aminotransferase               | 3.07         | -1.64        |
| PA14_28010        |                     | hypothetical protein                                                   | 3.50         | -1.68        |
| <b>PA14_33010</b> | <b><i>glyA2</i></b> | <b>serine hydroxymethyltransferase</b>                                 | <b>9.00</b>  | <b>-1.73</b> |
| PA14_68280        |                     | dicarboxylate transporter                                              | 2.36         | -1.74        |
| PA14_46370        |                     | two-component sensor                                                   | 2.29         | -1.78        |
| PA14_40650        |                     | hypothetical protein                                                   | 2.25         | -1.83        |
| PA14_67350        | <i>hutU</i>         | urocanate hydratase                                                    | 11.19        | -1.87        |
| PA14_39590        | <i>metE</i>         | 5-methyltetrahydropteroyltriglutamate/homocysteine S-methyltransferase | 9.45         | -1.98        |
| PA14_28390        |                     | hypothetical protein                                                   | 3.22         | -2.00        |
| <b>PA14_33030</b> | <b><i>sdaA</i></b>  | <b>L-serine dehydratase</b>                                            | <b>2.63</b>  | <b>-2.00</b> |
| PA14_14290        |                     | hypothetical protein                                                   | 2.56         | -2.19        |

<sup>a</sup>Upregulation (green) and downregulation (red) of gene expression in PA14 grown in blood from SBPs or TPs compared to healthy volunteers.

<sup>b</sup>If gene name was available.

<sup>c</sup>Genes in bold are also found in Table 2 in the manuscript.
